NKTT320 FINAL-JCI

1 **Adjuvant and immunomodulatory potential of Natural**  
2 **Killer T (NKT) activation by NKTT320**

3  
4 Nell G. Bond<sup>1</sup>, Marissa Fahlberg<sup>1</sup>, Shan Yu<sup>1</sup>, Namita Rout<sup>1</sup>, Dollnovan Tran<sup>1</sup>, Taylor  
5 Fitzpatrick-Schmidt<sup>1</sup>, Lesli Sprehe<sup>1</sup>, Elizabeth Scheef<sup>1</sup>, Joseph C. Mudd<sup>1</sup>, Robert  
6 Schaub<sup>2</sup> and Amitinder Kaur<sup>1\*</sup>

7  
8 <sup>1</sup>Tulane National Primate Research Center, Covington, LA, USA

9 <sup>2</sup>RGS Consulting, Pelham, NH, USA

10

11 \*Corresponding Author:

12 Email: [akaur@tulane.edu](mailto:akaur@tulane.edu) (AK)

13

14 Conflict of interest statement: Dr. Robert Schaub's former employment with NKT

15 Therapeutics, the manufacturer of NKTT320, may be considered a potential conflict of

16 interest.

NKTT320 FINAL-JCI

## 17 **Abstract**

18 Invariant natural killer T-lymphocytes (iNKT) are a unique subset of immunomodulatory  
19 innate T-cells with an invariant TCR $\alpha$  chain recognizing glycolipids presented on the  
20 MHC class-I-like CD1d molecule. Activated iNKT rapidly secrete pro-and anti-  
21 inflammatory cytokines, potentiate innate and adaptive immunity, and modulate  
22 inflammation. While iNKT activation by glycolipid agonists are being explored as an  
23 adjuvant, their use depends on CD1d-restricted antigen presentation. Here, we report  
24 the effects of iNKT activation by a novel humanized monoclonal antibody, NKTT320,  
25 that binds to the invariant region of the iNKT TCR. A single dose of NKTT320 led to  
26 rapid iNKT activation, increased polyfunctionality, and elevation of multiple pro-  
27 inflammatory and chemotactic plasma analytes within 24 hours in cynomolgus  
28 macaques. Flow cytometry and RNA-Seq confirmed downstream effects of NKTT320  
29 on multiple immune cell subsets. Inflammatory response, JAK/STAT and PI3K/AKT  
30 pathway genes were enriched along with upregulation of the inflammation-modulating  
31 genes CMKLR1, ARG2 and NLRP12. Finally, NKTT320 induced iNKT trafficking to  
32 adipose tissue and did not cause iNKT anergy. Our data indicate that NKTT320 has a  
33 sustained effect on *in vivo* iNKT activation, potentiation of innate and adaptive immunity,  
34 and resolution of inflammation, properties that support its future application as an  
35 immunotherapeutic and vaccine adjuvant.

## 36 Introduction

37 Invariant Natural Killer T (iNKT) lymphocytes are rare, innate T-lymphocytes with  
38 unique antigen recognition and immunomodulatory properties that make up  
39 approximately 0.01-0.1% of circulating T-lymphocytes in humans (1). iNKT were first  
40 discovered in mice during anti-tumor studies and named for the expression of the  
41 natural killer (NK) marker NK1.1 on T-lymphocytes. iNKT differ from classical T-  
42 lymphocytes in multiple distinct, important ways. iNKT express a conserved T-cell  
43 receptor (TCR)  $V\alpha$  chain with an invariant complementary determining region 3  
44 (CDR3 $\alpha$ ) as opposed to the polymorphic TCR on classical T-lymphocytes. Primate iNKT  
45 express  $V\alpha 24$ - $J\alpha 18$  which preferentially pairs with a restricted repertoire of  $V\beta$  subunits,  
46 generally  $V\beta 11$  (2). In contrast to classical T-lymphocytes, iNKT recognize and are  
47 rapidly activated by both endogenous and exogenous glycolipid antigens presented by  
48 antigen presenting cells (APCs) on nonpolymorphic MHC-class-I-like CD1d molecules.  
49 The classical, most widely studied iNKT activating lipid antigen is alpha-  
50 galactosylceramide ( $\alpha$ GC), derived from the marine sponge *Agelas mauritianus* and first  
51 identified in murine cancer studies (1). Upon activation, iNKT rapidly produce a wide  
52 range of cytokines covering T-helper (Th) 1, Th2 and Th17 functionality, often from the  
53 same cell (3). iNKT in primates are more strictly defined by co-staining of the  $\alpha$ GC-  
54 loaded CD1d tetramer (CD1dTM) and  $V\alpha 24$  on CD3<sup>+</sup> T-lymphocytes (4, 5).

55 Due to their rapid response and broad functional potential, iNKT bridge the gap  
56 between innate and adaptive immunity (6). Once activated, iNKT can be directly  
57 cytolytic (through perforin and granzyme B) and display Th1, Th2 and Th17 effector  
58 functions. Additionally, iNKT rapidly influence the function of multiple immune subsets

## NKTT320 FINAL-JCI

59 (6). Bidirectional interactions between iNKT and dendritic cells (DC) enhances DC  
60 maturation and facilitates antigen cross-presentation and priming of antigen-specific T-  
61 lymphocyte responses (7, 8). Activated iNKT can potentiate macrophage phagocytic  
62 function and affect polarization (6). IFN $\gamma$  production by iNKT rapidly activates natural  
63 killer (NK) cells improving cytotoxicity (9). Finally, iNKT are known to recruit and provide  
64 help to B-cells, improving B-cell maturation, antibody class-switching and overall  
65 humoral immunity (10, 11). Due to their diverse immunomodulatory properties, there is  
66 great interest in harnessing iNKT activation as an immunotherapeutic tool and a vaccine  
67 adjuvant.

68         Studies exploring  $\alpha$ GC-mediated iNKT activation as a vaccine adjuvant have  
69 largely been conducted in mice with varying degrees of success (12-16). One barrier to  
70 the use of iNKT activating agents such as soluble  $\alpha$ GC *in vivo* is subsequent iNKT  
71 anergy in which iNKT are rendered unable to respond to further stimuli (17, 18).  
72 Although administration of  $\alpha$ GC loaded on autologous DCs has shown promise for  
73 cancer immunotherapy in human studies (19-21), there is a need for alternate strategies  
74 of *in vivo* iNKT activation that can effectively harness the immunomodulatory properties  
75 of iNKT for widespread therapeutic use.

76         Antibodies directed against the iNKT cell receptor are one such class of  
77 potential alternative iNKT modulating agents. NKTT120 is a humanized monoclonal  
78 iNKT depleting antibody developed by NKT Therapeutics (Sharon, MA) that directly  
79 binds to the CDR3 region of the V $\alpha$ -subunit of the semi-invariant iNKT TCR with high  
80 affinity (22). NKTT120 was engineered with an IgG1 Fc, thus supporting Fc-receptor  
81 binding and iNKT depletion by antibody dependent cellular cytotoxicity (ADCC) (22).

## NKTT320 FINAL-JCI

82 NKTT120 successfully depleted iNKT without any adverse effects in healthy humans  
83 and macaques (22, 23). The humanized monoclonal antibody NKTT320 developed by  
84 NKT Therapeutics shares the variable region and iNKT binding specificity with NKTT120  
85 but was engineered with an IgG4 Fc (22) allowing it to successfully bind and activate  
86 iNKT without ADCC-mediated depletion (24, 25).

87         In this study, we characterized the *in vivo* effects of NKTT320 administration on  
88 iNKT function and bystander lymphocyte subsets in Mauritian-origin cynomolgus  
89 macaques (MCM). We show rapid induction of iNKT activation and polyfunctionality  
90 without anergy, downstream effects on monocytes, T- and B-lymphocytes, and gene  
91 enrichment in the inflammatory response, heme metabolism, JAK/STAT signaling and  
92 PI3K/AKT pathways. Our results demonstrate the utility of NKTT320 as an *in vivo*  
93 immunomodulatory tool and a potential novel vaccine adjuvant.

## 94 **Results**

### 95 **NKTT320 specifically activates iNKT**

96 To characterize the potential of NKTT320 as an adjuvant, we first conducted *in*  
97 *vitro* studies in unfractionated peripheral blood mononuclear cells (PBMCs) of MCM.  
98 MCM were chosen because their circulating iNKT frequencies and phenotype are  
99 similar to humans (26). As previously reported, iNKT were identified by flow cytometry  
100 as T-lymphocytes co-expressing the V $\alpha$ 24 TCR and binding to  $\alpha$ GC-loaded CD1d-  
101 tetramers (CD1dTM) (5, 26) (Figure 1A, Supplemental Figure 1). PBMCs stimulated *in*  
102 *vitro* with goat-anti-mouse-IgG (GAM-IgG) cross-linked NKTT320 at 200ng/mL showed  
103 specific iNKT activation as evidenced by CD3 downregulation, CD69 upregulation, and  
104 secretion of IFN $\gamma$  and TNF $\alpha$  compared to media alone (Figure 1B). Escalating  
105 concentrations of NKTT320 showed a dose-dependent effect on iNKT activation as  
106 indicated by downregulation of V $\alpha$ 24, CD1dTM, and CD3 (Figure 1C-D). At higher  
107 doses, a combination of TCR downregulation and competition for the same invariant  
108 TCR binding site resulted in loss of sensitivity to detect CD1dTM-positive iNKT (Figure  
109 1C). iNKT activation was not associated with non-NKT T-lymphocyte activation during a  
110 24-hour stimulation period demonstrating the iNKT specificity of NKTT320 (Figure 1B,  
111 D).

112 We then evaluated *in vitro* NKTT320 treatment for differences in activation of  
113 single positive CD4 or CD8 iNKT. Unstimulated cultured CD4<sup>+</sup> and CD8<sup>+</sup> iNKT did not  
114 differ in baseline activation levels measured by surface CD69 and HLA-DR expression  
115 (Figure 1E and data not shown). NKTT320 treatment led to significant activation of both  
116 CD4<sup>+</sup> (p=0.0312) and CD8<sup>+</sup> iNKT (p=0.0312) as measured by CD69 upregulation

## NKTT320 FINAL-JCI

117 (Figure 1E). There was no significant difference in activation of CD4<sup>+</sup> compared to CD8<sup>+</sup>  
118 iNKT (Supplemental Figure 2).

119 To examine broader functional changes resulting from NKTT320 treatment we  
120 cultured PBMC *in vitro* for 48 hours with either media alone (mock stimulation) or with  
121 cross-linked NKTT320 and measured secreted analytes using a non-human primate  
122 (NHP) 29-plex Luminex (Figure 1F). Eight analytes significantly elevated in the  
123 NKTT320-treated supernatants included proinflammatory and Th1 cytokines (IFN $\gamma$ ,  
124 TNF $\alpha$ , IL-12, IL-2, IL-15), chemokines (CCL4), and growth factors (FGF-basic, HGF).  
125 IL-6, CXCL8 (IL-8), CCL2, CCL3, and CCL5 (RANTES) trended higher but the increase  
126 did not reach statistical significance (Figure 1F).

127

### 128 **Differential iNKT activation with NKTT320 and $\alpha$ GC stimulation**

129 Since glycolipid agonists are being used for iNKT activation, we compared  
130 NKTT320 to the classic iNKT agonist,  $\alpha$ GC. In a series of time course *in vitro*  
131 stimulation experiments, all parameters of iNKT activation (CD69, IFN $\gamma$ , TNF $\alpha$ , IL-2 and  
132 IL-4) appeared more rapidly and were of greater magnitude after NKTT320 as  
133 compared to  $\alpha$ GC stimulation (Figure 2A). Increased IFN $\gamma$  and TNF $\alpha$  secretion, and  
134 increased iNKT polyfunctionality were apparent within 4 hours of NKTT320 stimulation  
135 (Figure 2A-B). With the exception of IL-4,  $\alpha$ GC-stimulated iNKT were able to match  
136 responses from NKTT320-stimulated cells by 48 hours (Figure 2A). The kinetic and  
137 qualitative differences in iNKT response between NKTT320 and  $\alpha$ GC stimulation has  
138 implications for therapeutic choice of NKT agonist.

139

## NKTT320 FINAL-JCI

### 140 **NKTT320 Pharmacokinetics**

141           After determining the effectiveness and specificity of iNKT activation with  
142 NKTT320, we set out to determine the pharmacokinetics of this antibody following *in*  
143 *vivo* administration. Dose escalation experiments were performed in three groups of  
144 MCM administered a single IV dose of NKTT320 at low (100 $\mu$ g/kg, n=5), mid (300 $\mu$ g/kg,  
145 n=3) and high (1000 $\mu$ g/kg, n=3) concentrations. These doses were selected based on  
146 previously published data of NKTT120 (22, 23). No adverse effects were observed  
147 following *in vivo* NKTT320 administration. Peak serum NKTT320 levels ranging  
148 between 5.94-77.46 $\mu$ g/mL were reached within 24 hours of a single IV dose. The iNKT  
149 TCR saturation level previously determined for NKTT120 on a Biacore assay against  
150 the immobilized iNKT TCR resulted in a  $K_D$  of 44nm corresponding to a saturation level  
151 of 6 $\mu$ g/mL (22). All NKTT320-treated animals in the high-and mid-dosing groups  
152 reached peak levels above the NKT TCR saturation level (6 $\mu$ g/mL) within 30 minutes of  
153 antibody administration while 4 of five animals in the low dose (100 $\mu$ g/kg) surpassed  
154 TCR saturation levels within 2 hours of administration (Figure 3A).

155           The kinetics of circulating NKTT320 showed animal to animal variation. Peak  
156 NKTT320 serum levels trended higher in the high dose group but did not reach  
157 significance (Figure 3A and data not shown). Plasma NKTT320 levels declined below  
158 detection in all animals 2-6 weeks post treatment, excepting one animal in the high dose  
159 group that maintained detectable serum NKTT320 levels through week 14. NKTT320  
160 plasma concentrations in the high dose group were used to determine the half-life of  
161 NKTT320 (Figure 3B). The calculated half-life of 6.81 days or 163.2 hours post



## NKTT320 FINAL-JCI

162 administration is less than the half-life of NKTT120 but consistent with variation in  
163 plasma clearance of human IgG antibodies in NHPs (22, 27).

164 One multiply dosed animal with successive NKTT320 doses administered at two-  
165 week intervals (dose 1=30 $\mu$ g/kg, dose 2=100 $\mu$ g/kg and dose 3=100 $\mu$ g/kg) reached the  
166 6 $\mu$ g/mL NKT TCR saturation level only after the second and third dose indicating that  
167 the first dose was not sufficient to surpass TCR saturation (data not shown). Multiple  
168 doses were additive in this animal and again peaked within 24 hours after each  
169 administration (data not shown). These limited data suggest that doses above 30 $\mu$ g/kg  
170 NKTT320 are needed for TCR saturation.

171

### 172 **NKTT320 effect on iNKT after *in vivo* administration**

173 We monitored *in vivo* changes in iNKT and non-iNKT ( $V\alpha 24^-$ ) T-lymphocytes  
174 from 30 minutes onwards following a single intravenous dose of NKTT320 (Figure 4).  
175 Similar to *in vitro* stimulation (Figure 1A-D), *in vivo* NKTT320 resulted in downregulation  
176 of  $V\alpha 24$  TCR and CD1d<sup>TM</sup>-positive iNKT-cells within 24 hours of administration  
177 (Supplemental Figure 3A). Because NKTT320 binds to the invariant region of the NKT  
178 TCR, the decrease in CD1d<sup>TM</sup>-positive iNKT could represent a 'masking' effect.  
179 However, the attendant downregulation of  $V\alpha 24$  TCR and CD3 (data not shown)  
180 indicates that the decline in detectable  $V\alpha 24$ /CD1d<sup>TM</sup> co-expressing iNKT following  
181 NKTT320 administration was also a result of *in vivo* NKT activation. Due to the loss of  
182 visualization of  $V\alpha 24^+$ CD1d<sup>TM+</sup> iNKT we also enumerated total  $V\alpha 24^+$  T-lymphocytes to  
183 monitor changes in circulating iNKT frequency post NKTT320 administration  
184 (Supplemental Figure 3B).

## NKTT320 FINAL-JCI

185 Both  $V\alpha 24/CD1d^{TM}$  co-staining iNKT and total  $V\alpha 24^+$  T-lymphocyte frequencies  
186 declined significantly after NKTT320 administration (Supplemental Figure 3B). While  
187  $V\alpha 24/CD1d^{TM}$  co-staining iNKT frequency was reduced by day 1 and remained  
188 significantly lower than baseline through week 14 ( $p < 0.05$  at all sampled time-points), a  
189 significant decline in total  $V\alpha 24^+$  T-lymphocyte frequency was only observed for one  
190 week post NKTT320 administration. The decline in  $V\alpha 24^+CD1d^{TM+}$  iNKT, likely the  
191 result of a masking effect, persisted well beyond the time that serum NKTT320 levels  
192 were undetectable. This may mean that iNKT-bound NKTT320 undetectable in the  
193 blood is slowly released in the tissues and continues to activate iNKT.

194 Monitoring of HLA-DR and CD69 surface expression revealed rapid, sustained  
195 iNKT-specific activation without general T-lymphocyte activation following NKTT320  
196 administration (Figure 4A). By 30 minutes, iNKT were significantly activated above  
197 baseline levels ( $p = 0.0156$ ) while non-iNKT ( $V\alpha 24^-$ ) T-lymphocytes were not activated.  
198 iNKT then remained significantly activated for 6 weeks after treatment. Non-iNKT T-  
199 lymphocytes showed a transient significant increase in HLA-DR or CD69 expression  
200 post NKTT320 treatment. Activation levels of circulating iNKT remained significantly  
201 above non-iNKT T-lymphocytes starting within 30 minutes of NKTT320 administration  
202 ( $p = 0.0039$ ) and persisted for at least 14 weeks ( $p = 0.0391$ ).

203 To distinguish responses of iNKT subsets, we investigated differences in  $CD8^-$   
204 and  $CD8^+$  iNKT activation. Both subsets were significantly activated within 30 minutes of  
205 NKTT320 administration; while  $CD8^-$  iNKT remained significantly activated through  
206 week 6 post treatment, increased  $CD8^+$  iNKT activation lasted two weeks (Figure 4B). In

## NKTT320 FINAL-JCI

207 contrast to in vitro data, circulating CD8<sup>-</sup> iNKT were significantly more activated  
208 compared to CD8<sup>+</sup> iNKT pre- and post NKTT320 administration ( $p < 0.01$ ).

209

### 210 **NKTT320 rapidly modulates T-lymphocyte function**

211 Central to investigation of NKTT320's utility as an adjuvant is its effect on other  
212 immune cell subsets. We used intracellular cytokine staining (ICS) flow cytometry to  
213 evaluate NKTT320-induced functional changes in mitogen responsiveness of iNKT and  
214 non-iNKT T-lymphocytes at discrete time-points after IV NKTT320 administration.  
215 Increased responsiveness of iNKT to overnight PMA/ionomycin stimulation was  
216 observed within 30 minutes of NKTT320 administration (Figure 5A). A significant  
217 increase in IL-2 secretion detected at 30 minutes post NKTT320 was sustained through  
218 day 14 post treatment. Likewise, IL-4 was significantly upregulated within two hours of  
219 NKTT320 treatment. Significant increases in IFN $\gamma$  and TNF $\alpha$  were observed day 3  
220 onwards. Increased responsiveness to mitogen stimulation was also observed in V $\alpha$ 24<sup>-</sup>  
221 "non-iNKT" T-lymphocytes but at a later onset suggesting downstream activation of  
222 other T-lymphocyte subsets. The increase in cytokine production in both iNKT and non-  
223 NKT T-lymphocytes mainly originated from CD4<sup>+</sup> T lymphocytes (Supplemental Figure 4  
224 and data not shown).

225 NKTT320 also rapidly increased iNKT polyfunctionality; by day 1, over 50% of  
226 responding iNKT secreted two or more cytokines on mitogen stimulation (Figure 5B).  
227 Increased polyfunctionality was less evident in the non-NKT T-lymphocytes. Overall,  
228 iNKT were activated rapidly in response to NKTT320 treatment and appear to have also  
229 induced changes in the functional potential of non-iNKT T-lymphocytes.

## NKTT320 FINAL-JCI

230

### 231 ***In vivo* iNKT activation results in rapid activation of the innate and adaptive** 232 **immune system**

233 The ability to modulate innate and adaptive immune responses is crucial when  
234 identifying promising immune modulatory tools and vaccine adjuvants. To assess the  
235 effect on the host immune response we longitudinally measured plasma analytes by  
236 Luminex, and monitored changes in immune cell frequency, phenotype and function by  
237 flow cytometry after *in vivo* administration of NKTT320.

238 A significant increase in 21 plasma analytes was detected in the first 72 hours of  
239 NKTT320 administration (Figure 6A, Supplemental Table 1). Plasma CCL2, CXCL10  
240 and IL-6 were elevated within 30 minutes reaching peak levels in the first 2 hours  
241 (Figure 6B). Significantly elevated analytes that peaked in the first 24 hours included  
242 cytokines and chemokines that likely originated from iNKT (IL-2, IL-4, IL-5, IL-6, IL-10,  
243 CCL4, CCL5) and from downstream activation of dendritic cells and  
244 monocytes/macrophages (IL-12, IL-1 $\beta$ , IL-1RA, CXCL8, CXCL9-11, IL-6, CCL2,  
245 CCL22). Interestingly, IFN $\gamma$ , TNF $\alpha$  and GM-CSF peaked later at 72 hours  
246 (Supplemental Table 1) suggesting iNKT and non-iNKT sources such as NK cells and  
247 other T-lymphocytes. Of note, the increase in plasma analytes corresponded temporally  
248 to the peak of plasma NKTT320 and iNKT-specific activation. The early response was  
249 indicative of rapid activation of the innate immune system and included proinflammatory  
250 analytes as well as several chemo-attractants crucial for immune cell recruitment of  
251 monocytes, granulocytes, NK cells and activated T-lymphocytes (28, 29).

## NKTT320 FINAL-JCI

252 Consistent with the Luminex data, flow cytometry revealed significant changes in  
253 circulating monocytes and B-lymphocytes (Figure 7). A significant increase in CD14<sup>+</sup>  
254 monocytes detected at day 1 post NKTT320 treatment had declined to baseline levels  
255 by week 6 (Figure 7A). Increased levels of proliferating CD20<sup>+</sup> B-lymphocytes as  
256 measured by Ki67 were detected beginning at day 1 ( $p=0.0156$ ) and intermittently  
257 thereafter (Figure 7B). These data are consistent with downstream effects of iNKT  
258 activation on other immune cell populations. The broad range of cytokines, chemokines  
259 and growth factors detected in response to NKTT320 treatment underscores its ability to  
260 rapidly activate the innate immune system and potentially serve as a vaccine adjuvant.  
261

### 262 **RNA-Seq analysis of effects of *in vivo* NKTT320**

263 To further investigate host immune modulation by NKTT320, we performed bulk  
264 RNA-Seq analysis on frozen unfractionated PBMC collected at 0, 30 minute, 2-hour,  
265 and 24-hour time-points post NKTT320 administration in four MCM with iNKT  
266 frequencies ranging between 0.1-10% of circulating T-lymphocytes (Figures 8-9). RNA-  
267 Seq analysis revealed significant sequential differential gene expression following  
268 NKTT320 treatment. At 30 minutes post NKTT320, there were 104 unique genes  
269 differentially expressed, followed by 244 and 740 genes at 2 and 24-hours, respectively  
270 (Figure 8A, Supplemental Table 2). Volcano plots showed significant changes in several  
271 genes. Notably, the scavenger receptor CD163 exclusively expressed on monocytes  
272 and macrophages (30), was significantly upregulated as early as 30 minutes and  
273 sustained through 24 hours (Figure 8B and 8C). Concomitantly, CD83 and TNF-Alpha-  
274 Induced Protein 3 (TNFAIP3) were significantly downregulated at 24-hours (Figure 8B).

## NKTT320 FINAL-JCI

275 CD83, a member of the immunoglobulin (Ig) superfamily expressed on mature DCs can  
276 regulate inflammation by suppressing IL-12 and MCP-1 production (31). Downregulation  
277 of TNFAIP3 or A20, an inhibitor of TCR signaling and NF- $\kappa$ B activation (32) was  
278 consistent with promotion of an inflammatory response.

279 Targeted analysis of differentially expressed genes showed elevation of several  
280 lymphoid genes related to monocytes, granulocytes, B-cells, T-cells and NK-cells as  
281 early as 30 minutes after NKTT320 administration (Figure 8C). Notable among these  
282 were upregulation of the following genes: the low affinity inhibitory Fc gamma receptor  
283 FCGR2B involved in regulation of antibody production by B-cells and modulation of  
284 antibody-dependent effector function of myeloid cells (33); Fc fragment of IgA receptor  
285 FCAR present on myeloid lineage cells and mediating phagocytosis and ADCC (34); C-  
286 type lectin-like receptor CLEC1B expressed on NK cells (35); CD14, CD163 expressed  
287 on monocytes and macrophages; IL-13 receptor alpha-1 chain (IL13RA1) involved in  
288 activation of JAK1, STAT3 and STAT6 induced by IL13 and IL4 (36); the MCP-1  
289 receptor CCR2 mediating monocyte chemotaxis (29); CD40 ligand (CD40L) expressed  
290 on iNKT and T-cells promoting DC-iNKT interactions and regulating B-cell function  
291 through CD4 help (6); colony stimulating factor 3 (CSF3R) or G-CSF receptor  
292 controlling granulocyte maturation and function (37); and N-formyl peptide receptors  
293 (FPR1, FPR3) that are powerful neutrophil chemotactic factors (38). Several  
294 inflammation-related and pattern-recognition receptor genes were elevated. These  
295 included IL1R1; extracellular and cytosolic receptors for bacterial flagellin, namely toll-  
296 like receptor 5 (TLR5), and neuronal apoptosis inhibitory protein NAIP that also acts as  
297 the sensor component of the NLRC4 inflammasome and promotes caspase-1 activation

## NKTT320 FINAL-JCI

298 (39); the carbohydrate sensing innate immune recognition ficolin FCN1 expressed in  
299 monocytes (40); and the C-type lectin receptor CLEC4E or MINCLE expressed on  
300 macrophages that recognizes fungal and mycobacterial ligands (41). Upregulation of  
301 the chemokine receptor genes CCR2 and CCR1 was concordant with elevated plasma  
302 levels of their respective ligands, CCL2 and MIP-1 $\alpha$ , post NKTT320 administration  
303 (Figure 8 and Supplemental Table 1). Overall, upregulation of these genes was  
304 indicative of a broad stimulation of the innate immune system with facilitation of antigen  
305 presentation function.

306 Simultaneously an immune downmodulation effect of NKTT320 was evident by  
307 upregulation of several immune inhibitory and inflammation suppressive genes (Figure  
308 8). These included the T-lymphocyte inhibitor PD-1 ligand 1 (CD274) (42); the arginine  
309 metabolism enzyme ARG2 that can regulate inflammation and immunity (43-46); the  
310 potent mitigator of inflammation, nucleotide-binding oligomerization domain protein  
311 NLRP12 that acts as a negative regulator of NF- $\kappa$ B and promotes degradation of NOD  
312 (47); the chemerin chemokine-like receptor CMKLR1 which binds the endogenous lipid  
313 mediator Resolvin E1 and actively regulates resolution of acute inflammation (48), the  
314 suppressor of cytokine signaling SOCS3 involved in the negative regulation of cytokines  
315 such as IL6 that signal through the JAK/STAT pathway (49), and ROR1 that can inhibit  
316 the Wnt3a-mediated signaling pathway (50). These data point to an inflammation  
317 suppressive effect of NKTT320-mediated iNKT activation acting in concert with  
318 activation of B-cells, monocytes, dendritic cells, and T-helper pathways. It is noteworthy  
319 that both activating and suppressive effects were detected in the first 24-hours of

## NKTT320 FINAL-JCI

320 NKTT320 administration. The inhibitory signals may reflect a feed-back loop following  
321 initial activation.

322 Downregulation of genes such as PRF1, NCR1, GNLY, GZMB, GZMH, CD244  
323 associated with T-lymphocyte and NK cytotoxicity (Figure 8) was unexpected due to the  
324 functional evidence for T-lymphocyte activation. Of these, CD244 or 2B4, which belongs  
325 to the signaling lymphocyte activation molecule (SLAM)-receptor family and is  
326 expressed on NK cells, as well as on some T-cells, monocytes and basophils, can serve  
327 as both an activating and inhibitory receptor (51).

328 We followed the targeted gene analysis with an unbiased analysis of differentially  
329 expressed genes post NKTT320 administration. Using Gene Set Enrichment Analysis  
330 against four pathway databases, an aggregate of 201, 332, and 423 enriched pathways  
331 were detected at 30 minutes, 2 hours and 24 hours respectively post NKTT320  
332 administration (Supplemental Tables 3-4). Normalized enrichment scores of 10  
333 biological pathways related to NKT-lymphocytes that were significantly altered on  
334 NKTT320 administration along with heatmaps of genes in these pathways reaching a  
335 significant threshold are shown (Figure 9A-B). Because of CD163 upregulation and  
336 upregulation of genes involved in phagocytosis we also evaluated genes in the  
337 scavenger receptor activity pathway (Figure 9C).

338 Several genes from the inflammatory response, heme metabolism, neutrophil  
339 degranulation, IL-6/JAK/STAT3, and PI3K/AKT pathways were increased within 24  
340 hours of NKTT320 (Figure 9B). Among the upregulated genes, elevation of the CLEC9A  
341 gene in the carbohydrate binding pathway was noteworthy. Targeting antigens to the C-  
342 type lectin CLEC9A on DCs can induce strong humoral immunity and T follicular helper



## NKTT320 FINAL-JCI

343 responses independent of adjuvant and is being explored as a vaccine strategy (52,  
344 53). Upregulation of the heme metabolism pathway SDCBP gene encoding the  
345 syndecan binding protein or syntenin-1 is interesting as it regulates TGF $\beta$ 1-mediated  
346 downstream activation (54).

347 Downregulated genes in the pathway analysis included the cyclin family gene  
348 CCND3, platelet-derived growth factor PDGFB, PIK3CB, and LPAR1, a member of the  
349 G protein-coupled receptor superfamily with diverse biological functions including  
350 proliferation and chemotaxis. The functional effects of genes that were downregulated  
351 appeared to be both pro-activation as well as anti-inflammatory. Several of the  
352 downregulated genes in the TNFA signaling pathway were inhibitors of NF- $\kappa$ B activation  
353 and it is likely that their suppression would lead to increased activation. Examples  
354 include suppression of TNFAIP3 and ZC3H12A, an IL-1-inducible gene encoding the  
355 monocyte chemotactic protein-1-induced protein-1 (MCPIP1) that acts as a  
356 transcriptional activator but also suppresses NF- $\kappa$ B activation (55). Similarly,  
357 suppression of the sphingosine kinase 1 gene (SPHK1) has been shown to potentiate  
358 induction of RANTES (56). The clock gene PER1 regulates pro-inflammatory mediators,  
359 and its suppression can lead to increased CCL2 and IL6 (57). On the other hand,  
360 downregulation of PIK3CB or PI-3 kinase subunit beta in the PI3K/AKT pathway can be  
361 instrumental in suppressing inflammation by prevention of AKT phosphorylation and  
362 inducing FOXO activation (58).

363

364 **iNKT maintain proliferative ability and avoid anergy following NKTT320 treatment**

## NKTT320 FINAL-JCI

365 One hurdle to therapeutic modalities of *in vivo* iNKT activation is the induction of  
366 iNKT anergy. Administration of soluble  $\alpha$ GC *in vivo* results in rapid iNKT activation  
367 followed by subsequent iNKT anergy in response to further stimulation (18). To test  
368 whether *in vivo* NKTT320 treatment induces anergy, we performed *in vitro* proliferation  
369 assays in PBMC from NKTT320-treated animals, measuring Ki67 and BrdU double-  
370 positive cells after a 6-day stimulation with  $\alpha$ GC. iNKT of animals that had received  
371 NKTT320 did not display anergy. On the contrary they were more responsive to *in vitro*  
372  $\alpha$ GC stimulation and showed increased proliferation compared to a pre-NKTT320 time-  
373 point (Figure 10A). Furthermore, iNKT-cells continued to expand in culture on  $\alpha$ GC  
374 stimulation pre- and post NKTT320 treatment providing further evidence that the  
375 monoclonal antibody does not induce iNKT anergy (Figure 10B). The increased *in vitro*  
376 iNKT expansion was specific to  $\alpha$ GC stimulation and not seen with other stimuli  
377 (Supplemental Figure 5). These results were reproducible at day 1 post NKTT320 in 3  
378 of 5 animals assessed by proliferation assays (data not shown). In the single multiply  
379 dosed animal, iNKT proliferative ability temporally followed increases in NKTT320  
380 plasma concentration after each dose (Figure 10C). Finally, we saw a comparable or  
381 greater increase in plasma IL1RA, IL-6 and MCP-1 after a second dose of NKTT320,  
382 providing further evidence for absence of anergy (Figure 10D).

383

### 384 **Increased iNKT frequency in adipose tissue after NKTT320 administration**

385 Our observations on the effect of NKTT320 were thus far confined to the  
386 examination of peripheral blood where we did not detect an increase in iNKT frequency.  
387 To investigate trafficking or effect on tissue iNKT, we examined iNKT frequency pre-and

NKTT320 FINAL-JCI

388 14 days post-NKTT320 administration in lymph node (LN), bone marrow (BM),  
389 bronchoalveolar lavage (BAL), rectal mucosa (REC) and adipose tissue in a subset of  
390 animals. Adipose tissue is known to be a site of iNKT localization in humans (59).  
391 Interestingly, we observed an increased frequency of adipose iNKT while iNKT  
392 frequency at other tissue sites was unchanged (Figure 11A-B). This suggests that either  
393 adipose-resident iNKT proliferate in response to NKTT320 treatment or iNKT are  
394 trafficking to adipose tissue following NKTT320 treatment.

NKTT320 FINAL-JCI

## 395 **Discussion**

396           This study is the first demonstration of sustained *in vivo* iNKT activation using the  
397 novel iNKT-activating humanized monoclonal antibody, NKTT320, that selectively binds  
398 with high affinity to the invariant NKT TCR in humans (25). We used the nonhuman  
399 primate model of MCM to extensively characterize the *in vitro* and *in vivo* effects of  
400 NKTT320 and assess its utility as an adjuvant and immunomodulatory tool. *In vitro*,  
401 NKTT320 showed dose-dependent iNKT-specific activation and increased cytokine  
402 production. *In vivo*, a single intravenous inoculation of NKTT320 was sufficient to rapidly  
403 induce iNKT activation that was sustained for up to 6 weeks without causing anergy.  
404 NKTT320-induced iNKT activation was associated with downstream activation of non-  
405 NKT immune cell subsets and iNKT trafficking to or proliferation within adipose tissue.  
406 Even though iNKT accounted for only 0.1-10% of circulating T-lymphocytes, iNKT  
407 activation had a profound amplification effect due to downstream effects on a wide  
408 range of immune cells. Our findings on iNKT activation and downstream effects on  
409 CD4<sup>+</sup> T-lymphocytes, monocytes, dendritic cells and B cells, make NKTT320 a  
410 promising candidate for immunotherapy and vaccine adjuvant.

411           NKTT320 led to iNKT-specific activation within 30 minutes of administration and  
412 was accompanied by increased iNKT polyfunctionality with Th1 and Th2 cytokine  
413 secretion, increased proliferative capacity and trafficking to adipose tissue. A greater  
414 stimulatory effect on CD4<sup>+</sup> iNKT was observed as they were the major source of the  
415 cytokines contributing to increased polyfunctionality in mitogen-stimulated iNKT. An  
416 increase in IL-2 and IL-4 was followed by IFN $\gamma$  and TNF $\alpha$  production. IL-2 and IL-4 are  
417 both known to regulate and promote T-cell differentiation into Th1 and Th2, respectively.

## NKTT320 FINAL-JCI

418 Additionally, lymph node iNKT secreting IL-4 were recently shown to be a key mediator  
419 of humoral immunity, improving B-cell maturation and differentiation as well as antibody  
420 class switching (60, 61). Early increases in iNKT function were followed from day 3  
421 onwards by increased cytokine secretion from non-iNKT T-lymphocytes, most notably  
422 IL-2, IL-17 and IL-22. Looking beyond the adjuvant potential of NKTT320, these Th17  
423 cytokines are of particular interest in the context of HIV infection as they are known to  
424 play a major role in maintaining gut mucosal integrity.

425 NKTT320-induced activation had features that were distinct from glycolipid iNKT  
426 agonists. While NKTT320 activated iNKT within two hours of stimulation and reached  
427 peak response levels by 16 hours,  $\alpha$ GC stimulation was slower to catch up requiring 48  
428 hours to reach comparable levels. Additionally, NKTT320 resulted in a broader Th1 and  
429 Th2 response whereas  $\alpha$ GC skewed towards Th1 alone. Whether this holds true *in vivo*  
430 remains to be seen. Few *in vivo* studies of iNKT activation using  $\alpha$ GC in humans and  
431 macaques have described functional changes by ICS in response to mitogen  
432 stimulation. When described, increases in Th1 cytokine production, primarily IFN $\gamma$  were  
433 reported (62). Although synthetic sphingolipid NKT agonists that drive Th2 responses  
434 are available (63), NKTT320 may be advantageous because it fosters an environment  
435 of increased responsiveness directing polyfunctional responses to specific stimuli  
436 without the need for structural modifications. Furthermore, NKTT320 does not rely on  
437 CD1d-mediated antigen presentation for iNKT activation. This could be an advantage in  
438 disease settings such as tumors and HIV infection associated with CD1d  
439 downregulation. Another major advantage of NKTT320 is the absence of NKT anergy.  
440 Following *in vivo* treatment with  $\alpha$ GC, iNKT rapidly become anergic and are unable to

## NKTT320 FINAL-JCI

441 respond to further stimuli-either iNKT specific or general TCR stimulation (18). The ideal  
442 tool for *in vivo* iNKT modulation would transiently activate iNKT while avoiding anergy.  
443 The fact that *in vivo* NKTT320 activates iNKT in the absence of anergy further  
444 underscores the promising nature of this antibody as an effective tool for *in vivo* immune  
445 manipulation.

446         Circulating iNKT frequencies were transiently reduced post NKTT320, which is  
447 consistent with previous studies of *in vivo* iNKT activation using  $\alpha$ GC in pig-tailed  
448 macaques and humans (62, 64, 65). It is important to consider that the decrease in  
449 circulating iNKT frequency could be the result of a masking effect due to NKTT320  
450 binding to the same site as CD1d<sup>TM</sup>, or to activation and subsequent downregulation of  
451 the iNKT TCR rendering it difficult to detect iNKT. Another explanation is that iNKT  
452 trafficking to tissue effector sites after activation could also transiently decrease the  
453 frequency of circulating iNKT. Our observation of elevated iNKT frequencies in adipose  
454 tissue following NKTT320 treatment suggests this possibility. This is an interesting  
455 finding as adipose tissue has been recently recognized as an inflammatory site with  
456 significant involvement in metabolic syndromes (66). Additionally, adipose tissue is a  
457 known site of HIV/SIV reservoir (67). The ability of NKTT320 to induce either  
458 proliferation or trafficking of iNKT to adipose tissue has implications for use in targeting  
459 the HIV/SIV reservoir. Further investigation of the tissue effects of NKTT320 are  
460 warranted.

461         Due to the unique regulatory function of iNKT-cells, iNKT activation influences  
462 downstream immune cells. Through multiple lines of evidence based on flow cytometry,  
463 Luminex and RNA-Seq data, we show profound and broad effects of NKTT320 on the

## NKTT320 FINAL-JCI

464 innate and adaptive immune system, particularly on monocytes/macrophages.  
465 Increased levels of plasma IL-6, CCL2 and CXCL10 were detected as early as 30  
466 minutes after NKTT320 antibody administration. A significant increase in circulating  
467 CD14<sup>+</sup> monocyte frequency was observed at day 1 along with rapid upregulation of  
468 CD14, CD163 and CLEC4E gene expression within 30 minutes of antibody  
469 administration. Additionally, CCR2 (present on activated macrophages) gene  
470 expression was significantly upregulated at two hours in concert with significantly  
471 elevated plasma levels of its ligand CCL2. These data point to a rapid release of  
472 proinflammatory cytokines and chemokines along with mobilization of monocytes and  
473 activated macrophages initiated by NKTT320 administration. The downstream effects of  
474 NKTT320-mediated iNKT activation also included release of chemo-attractants involved  
475 in the recruitment of granulocytes, NK cells, and T-lymphocytes to sites of inflammation.  
476 Increase in chemokines involved in granulocyte recruitment included CCL11 (eotaxin)  
477 for eosinophil recruitment; CXCL8 (IL8) for neutrophil recruitment; CCL2 (MCP1)  
478 chemoattractant for basophils and monocytes; CXCL9-11 for chemoattraction of Th1  
479 CXCR3-expressing T-cells to inflammatory sites; and CCL22 (MDC) chemoattractant for  
480 monocytes, DC, NK and T-lymphocytes (28). Surprisingly, several genes in the IFN $\gamma$   
481 and TNF $\alpha$  signaling pathways and cytotoxic related genes were downregulated despite  
482 evidence of elevated plasma TNF $\alpha$  and IFN $\gamma$  by Luminex. Although unexpected, the  
483 transcriptomics data represented a snap-shot of the first 24 hours whereas in the  
484 Luminex we saw plasma levels of TNF- $\alpha$  and IFN- $\gamma$  peak only at 72 hours. mRNA and  
485 protein expression levels are often discordant for the same time-point during dynamic

## NKTT320 FINAL-JCI

486 transitions, as was the case in the first 24 hours of NKTT320 administration which likely  
487 explains differences in Luminex and RNA-Seq data (68).

488         Several pattern recognition receptor genes expressed on dendritic cells and  
489 monocyte/macrophages were modulated by NKTT320. Notable among them was the C-  
490 lectin type receptor CLEC9a which is expressed on DCs and has been shown to  
491 efficiently induce humoral immunity and a T follicular helper response when antigen  
492 targeted to CLEC9a displays it to B-cells (52, 69). Evidence of early DC activation was  
493 manifested by increased plasma IL-12 detection along with increased gene expression  
494 for a range of C-lectins associated with APCs. Additionally, gene expression of TLR5, a  
495 ubiquitous pathogen recognition marker found on DCs, and NAIP involved in bacterial  
496 flagellin recognition were upregulated. CD40 ligand (CD40L) gene expression was also  
497 upregulated likely on NKT and other CD4<sup>+</sup> T-lymphocytes. A major pathway by which  
498 NKT promote DC/APC maturation is by upregulation of CD40L providing co-stimulation  
499 to DCs via CD40L and IFN $\gamma$ , TNF $\alpha$  (6). Moreover, NKT licensing of DCs for antigen  
500 cross-presentation can determine the type of the immune response. These data  
501 underscore the effect of NKTT320 on APCs which could lead to improved antigen  
502 presentation and potentiation of cellular immunity.

503         In addition to effects on APCs, we found that NKTT320 treatment had  
504 downstream effects on B-cells suggesting synergistic effects that likely improve humoral  
505 immunity. In the absence of a vaccine allowing a direct readout of humoral immune  
506 responses we found several indications of effects of NKTT320 treatment on B-cells. We  
507 found that B-cell proliferation was significantly increased, with Ki67 expression on  
508 circulating CD20<sup>+</sup> B-cells reaching significantly higher levels at day 1 after antibody



## NKTT320 FINAL-JCI

509 administration. Furthermore, increased B-cell proliferation paired with increases in IL-4  
510 expression from iNKT within 2 hours of NKTT320 administration, suggests the potential  
511 for this antibody to improve humoral immunity. These findings were corroborated by the  
512 rapid upregulation of B-cell related genes FCAR, IGJ and FCGR2B. These data show  
513 the potential to harness the effect of iNKT using NKTT320 to improve APC and B-cell  
514 function ultimately improving antigen-specific antibody responses in the context of  
515 vaccination or infection.

516         Interestingly, our data show the potential of NKTT320 to modulate both  
517 inflammatory and anti-inflammatory responses. As illustrated in the schematic (Figure  
518 12), side-by-side with activation, NKTT320 triggered several genes encoding markers of  
519 resolution of inflammation. Most prominent of the upregulated genes included the  
520 inflammation resolution genes NLRP12 and CMKLR1 (48, 70), the metabolic regulator  
521 ARG-2 (46), and the inhibitory receptors FCGR2B and PD-L1 (33, 42). In all, the  
522 concordant immune activation and anti-inflammatory responses induced by NKTT320  
523 may mean that there is a potential *in vivo* for eliciting potent inflammatory responses  
524 without excessive or non-resolving immune activation. This remains to be tested in both  
525 long-term studies and in the context of vaccination or infection.

526         In summary, the current studies detailed here investigate the use of NKTT320,  
527 an iNKT-specific humanized monoclonal antibody, for *in vivo* iNKT activation for the first  
528 time in the NHP model. We found, through multiple modes of investigation, that this  
529 antibody directly affects iNKT without inducing anergy and subsequently transactivates  
530 other immune subsets, most strikingly monocytes and macrophages. NKTT320  
531 administration induces potent functional changes in both T-cell and non-T-cell subsets

NKTT320 FINAL-JCI

532 that may influence both innate and adaptive immunity. It also triggers a balanced  
533 immune response with induction of anti-inflammatory responses to balance immune  
534 activation. The long half-life of NKTT320 as well as detection of effects on iNKT  
535 functionality well beyond the duration of detectable plasma NKTT320 indicates that this  
536 therapeutic modality would be feasible in human studies or in a translational setting.  
537 NKTT320 is a promising iNKT activating agent that should be studied further for efficacy  
538 as a vaccine adjuvant and immunotherapeutic tool.

539

540

541

NKTT320 FINAL-JCI

## 542 **Materials and Methods**

### 543 **Ethics statement for *in vivo* non-human primate studies**

544 *In vivo* non-human primate studies were performed at New England Primate Research  
545 Center (NEPRC) (Boston, MA; 2013-2015) and Tulane National Primate Research  
546 Center (TNPRC) (Covington, LA; 2015-2018). This study was carried out in accordance  
547 with the Guide for the Care and Use of Laboratory Animals of the NIH. The protocol was  
548 reviewed and approved by the Institutional Animal Care and Use Committees (IACUCs)  
549 at NEPRC and TNPRC. The facilities also maintained an Animal Welfare Assurance  
550 statement with the National Institutes of Health, Office of Laboratory Animal Welfare.

551

### 552 **Animals and Study design**

553 We longitudinally evaluated blood from adult male MCM (n=12) and tissues from a  
554 subset of these animals (n=3), pre and post NKTT320 treatment.

555 *Single-dose pharmacokinetic studies:* NKTT320 was administered by intravenous route  
556 at escalating doses in three groups: low (100 $\mu$ g/kg, n=6), mid (300 $\mu$ g/kg, n=3) and high  
557 (1000 $\mu$ g/kg, n=3). Samples were taken prior to NKTT320 administration, and 30  
558 minutes, 2 hours, days 1, 3, 7, and weeks 2, 4, 6, 8, and 14 post treatment. Animals  
559 were released to the second phase of the study after the final time point.

560 *Repeated dose studies:* One animal received 3 doses of NKTT320—30 $\mu$ g/kg, 100 $\mu$ g/kg  
561 and 100 $\mu$ g/kg—at 2-week intervals.

562

### 563 **Processing of peripheral blood and tissues**

## NKTT320 FINAL-JCI

564 Peripheral blood mononuclear cells (PBMCs) were isolated from MCM by density  
565 gradient centrifugation. In brief, peripheral blood was diluted 1:1 in PBS and layered  
566 over 90% ficoll at a 1:2 ratio. The gradient was then spun at 2,200 rpm for 45 minutes  
567 with the brake off. Cells were then isolated, washed and counted according to standard  
568 methods. PBMCs were used for phenotyping and functional assays. In a subset of  
569 experiments bone marrow (BM), bronchoalveolar lavage (BAL), peripheral lymph node  
570 (PLN), rectal mucosa, subcutaneous abdominal adipose tissue biopsies were taken. In  
571 brief, tissue lymphocytes were isolated as follows. BM was treated identically to  
572 peripheral blood, described above. BAL was strained, spun at 1,500 rpm for 5 minutes  
573 and counted. PLN lymphocytes were isolated using mechanical separation. Rectal  
574 mucosa lymphocytes were isolated by enzymatic digestion with EDTA followed by  
575 collagenase II. Remaining tissue was mechanically disrupted, strained and washed  
576 before counting. Similarly, adipose tissue was initially digested using collagenase II  
577 followed by mechanical disruption, straining out remaining tissue and washing the cells  
578 before counting. Tissue lymphocytes were used to assess iNKT frequency within  
579 tissues following activation with NKTT230.

580

### 581 **NKTT320 ELISA**

582 NKT Therapeutics developed an enzyme-linked immunosorbent assay (ELISA) to  
583 determine NKTT320 concentration in monkey plasma or serum based on the detection  
584 of human IgG4. Briefly, 96 well plates were coated with monkey adsorbed goat anti-  
585 human IgG (1 $\mu$ g/mL) and incubated at 37°C for 2 hours or 4°C overnight. Plates were  
586 washed 3x with wash buffer (0.05% Tween 20 in 1X PBS). Wells were blocked using

## NKTT320 FINAL-JCI

587 3% BSA in 1X PBS for 2 hours at room temperature. Plates were washed as described  
588 above, diluted samples, standards and controls were added and incubated for either 2  
589 hours at room temperature or overnight at 4°C. For antibody detection, 0.1µg/mL goat  
590 anti-human IgG Biotin (monkey adsorbed) was added to each well and incubated for 1  
591 hour at room temperature. Plates were washed as described above, 100µL diluted  
592 streptavidin-HRP polymer (SPP) conjugate was added, and samples were incubated 1  
593 hour at room temperature. Plates were washed as described above, 100µL of  
594 Tetramethylbenzidine (TMB) was added to each well, incubated in the dark for between  
595 10-20 minutes and the reaction was stopped by adding 100µL stop solution to each  
596 well. Plates were read at 450nm within 30 minutes of adding stop solution on a Biotek  
597 synergy 2 (Winooski, VT) microplate reader and data was acquired and analyzed using  
598 Gen5 1.11.5 software, Excel and GraphPad/PRISM.

599

### 600 **Cells and reagents**

601 *CD1d transfectants*: C1R cells (5) were used either loaded with αGC (Avanti Polar  
602 Lipids; Alabaster, AL) or alone to stimulate PBMC to compare a known iNKT specific  
603 stimulant with NKTT320 stimulation. C1R transfectant T-cells were used at a ratio of 1:10  
604 C1R: PBMC for stimulation.

605 *Alpha-galactosylceramide*: αGC stock was received at 2mg/mL from Avanti Polar Lipids,  
606 Alabaster, AL and stored in 10µL aliquots in brown glass at -80°C. Aliquots of working  
607 solution of 20µg/mL in R10 medium (RPMI+Hepes+L-glutamine+10% fetal calf serum)  
608 were stored at -20°C until use. αGC was loaded onto C1Rd cells and used for iNKT  
609 stimulation at a final concentration of 100ng/mL.

## NKTT320 FINAL-JCI

610 *NKTT320 monoclonal antibody*: NKTT320 is a humanized monoclonal antibody  
611 developed by NKT Therapeutics (Sharon, MA) that binds to the CDR3 region of the  $V\alpha$   
612 chain of the human iNKT TCR (22, 25, 71). NKTT320 is the sister antibody to NKTT120  
613 (22, 23). Briefly CD1d knock out mice, which lack iNKT-cells, were immunized with  
614 cyclic peptides from the CDR3 loop of the TCR $\alpha$  and screened for antibodies. One  
615 mouse monoclonal antibody designated 6B11, was identified as specific for human  
616 and non-human primate but not rodent iNKT-cells. 6B11 has demonstrated the ability  
617 to identify, purify, activate and expand iNKT-cells (72). To permit the clinical evaluation  
618 the murine mAb, 6B11, was humanized and de-immunized using the “Composite  
619 Human Antibody™ Technology” (Antitope Ltd., Cambridge, UK) to a stabilized IgG4  
620 activating antibody NKTT320. NKTT320 was evaluated by Surface Plasmon  
621 Resonance (SPR) assays to determine the binding affinity to soluble human iTCR.  
622 NKTT320 binds specifically and selectively to the human iTCR with a  $K_D$  of  
623 approximately 44 nM. Measurement of binding affinity and functional characterization  
624 of NKTT320 was performed using recombinant human invariant TCR and cells.  
625 NKTT320 was produced by Antitope LTD (Cambridge, UK) in a transfected CHO-M cell  
626 line provided by Selexis sa (Chemin des Aulx Switzerland).  
627 *Monoclonal antibodies for flow cytometry*: Monoclonal antibodies were used for  
628 phenotyping and flow cytometric functional assays. Antibody clone, vendor and panel  
629 information can be found in Supplementary Table 5.

630

## 631 **iNKT Detection**

## NKTT320 FINAL-JCI

632 CD1dTMs loaded with  $\alpha$ GC conjugated to either APC or BV421 were obtained from the  
633 NIH Tetramer core. These loaded tetramers were titrated and used at the optimal  
634 titrated volume. iNKTs are identified based on co-expression of CD1d-TM and V $\alpha$ 24 as  
635 described previously (5). Briefly, isolated cells were washed, incubated with titrated  
636 volumes of CD1dTM at room temperature for 30 minutes followed by addition of the  
637 remaining antibodies in the staining cocktail for 20 minutes. Standard flow cytometric  
638 protocols were used for the remaining surface or intracellular cytokine staining panels. A  
639 minimum of 2 million PBMCs were used for flow cytometric staining to allow for at least  
640 200,000 lymphocyte events to be captured to visualize rare iNKT populations. All flow  
641 cytometry panels were run on either BD LSR-II or BD Fortessa instruments (BD,  
642 Franklin Lakes, NJ) by the TNPRC Flow Cytometry Core.

643

### 644 ***In vitro* iNKT stimulation**

645 *In vitro stimulation with soluble NKTT320:* Peripheral blood mononuclear cells (PBMC)  
646 isolated from 3 MCM were incubated with escalating concentrations (0.1, 1, 10 and  
647 25ug/mL) of NKTT320 diluted in R10 media (RPMI/1%Hepes/10%FBS). Cells were  
648 incubated overnight at 37°C and harvested for Flow Cytometry staining.

649 *In vitro stimulation with cross-linked NKTT320:* PBMC were stimulated with 200ng/mL  
650 NKTT320 cross-linked with goat-anti-mouse (GAM) IgG Fab2 fragments. Briefly wells  
651 were first coated with GAM-IgG at 2.5ng/mL (SeraCare, formerly KPL, Gaithersburg,  
652 MD) in 50mM TRIS buffer (pH=8.6), 1mL per well, and incubated for 1 hour at 37°C.  
653 Wells were then washed 3x with PBS and 1mL/well 200ng/mL NKTT320 in PBS was  
654 added. Plates were then incubated another hour at 37°C, washed and 1 million PBMC

## NKTT320 FINAL-JCI

655 in R10 media were added to each well. Cells were then incubated 48 hours, harvested  
656 for flow cytometry; supernatants were harvested for Luminex assay.

657 *In vitro stimulation with  $\alpha$ GC:* PBMC were stimulated with 100ng/mL  $\alpha$ GC loaded onto  
658 C1Rd cells. C1Rd cells were irradiated at 10,000 rads (100 Gy) and mixed with PBMCs  
659 at a ratio of 1:1000. Finally, 100ng/mL  $\alpha$ GC was added and plates were incubated 48  
660 hours. Cells were then harvested for flow cytometry and supernatants were harvested  
661 for Luminex assay.

662

### 663 **Proliferation Assays**

664 *In vitro* proliferation assays were conducted to assess iNKT proliferative ability and  
665 anergy following multiple *in vivo* doses of NKTT320. PBMC from days 0, 1, 7, 14  
666 following each dose of NKTT320 were assessed. One million PBMC per condition were  
667 stimulated with either R10 media,  $\alpha$ GC or staphylococcal enterotoxin B (SEB) (Sigma,  
668 Saint Louis, MO). Cells were seeded at 0.2M per well in a 96-well plate and brought up  
669 to 200 $\mu$ L/well with R10, 100ng/mL  $\alpha$ GC or 200ng/mL SEB. Plates were incubated at  
670 37°C for 5-6 days and 10 $\mu$ M Bromo-2'-deoxyuridine (BrdU, vendor) was added to each  
671 well 24 hours prior to staining. On the 6-7<sup>th</sup> day of incubation, cells were pooled by time-  
672 point and stimulation condition and analyzed by flow cytometry.

673

### 674 **Luminex**

675 Luminex technology was used to assess plasma chemokine and cytokine levels  
676 following NKTT320 treatment in 12 MCM. We used the Invitrogen (Carlsbad, CA)  
677 magnetic bead Monkey Cytokine Magnetic 29-Plex Panel covering the following



NKTT320 FINAL-JCI

678 analytes: EGF, HGF, VEGF, MIG, RANTES, Eotaxin, IL-8, GM-CSF, TNF alpha, IL-1  
679 beta, IL-2, IL-4, IL-5, IL-6, IL-10, IL-12, MIP-1 alpha, IL-17, MIP-1 beta, IP-10, IL-15,  
680 MCP-1, G-CSF, IFN gamma, FGF-Basic, IL-1RA, MDC, MIF, I-TAC. Final reactions  
681 were read on a Bio-Plex® 200 System (Bio-Rad Laboratories, Hercules, CA) results  
682 were calculated using Bio-Plex Manager™ Software v6.2 (Bio-Rad) by the TNPRC  
683 Pathogen Quantification and Detection Core.

684

### 685 **RNA-Seq**

686 *Sample preparation for RNA-Seq:* RNA was extracted from snap frozen, unfractionated  
687 PBMCs using the Qiagen RNeasy Plus Mini Kit (Qiagen 74134). Briefly, cells were first  
688 thawed and pelleted, then lysed following the kit protocol. gDNA was removed using a  
689 gDNA Eliminator spin column, and remaining flow through was added to a RNeasy spin  
690 column to bind RNA. The spin column/RNA was washed, RNA was eluted and stored  
691 at -80°C. Later, samples were concentrated using Zymo Clean & Concentrate-5 Kit  
692 (R1013). Briefly, RNA was thawed, bound, and added to the Zymo-Spin IC Column.  
693 Then RNA bound to the column was washed, eluted, aliquoted and stored at -80°C.  
694 Sample concentration was analyzed on the Qubit Fluorometer using the Qubit RNA BR  
695 Assay Kit. Samples were analyzed on the Tape Station at the Sequencing Core at  
696 CTRII Tulane University to determine RNA integrity number (RIN). Samples were then  
697 submitted for RNA-Seq analysis using a high output, and single read 75 cycle run.

698 *RNA-Seq data analysis:* RNA-seq for Eukaryotes Analysis v3 was used for sequencing  
699 analysis and built by the Banana Slug Genomics Center at the University of California  
700 Santa Cruz. First, an Illumina sequencer at the Tulane School of Medicine Genomics

## NKTT320 FINAL-JCI

701 Core was used to construct raw sequencing reads which were checked for quality and  
702 contaminants using FastQC (73). Next, Trimmomatic was used to trim adapter  
703 sequences and primers from the sequencing reads (74). Removal of polyA tail, polyN,  
704 and read segments with a quality score below 28 was accomplished by using PRINSEQ  
705 (75). Following trimming, any reads of length less than 20bp were removed. Quality  
706 check was repeated, and high-quality reads were then mapped to the GRCh37/hg19  
707 reference genome using STAR (76, 77) with NCBI RefSeq (78) annotated genes  
708 transcriptome index data. Raw read counts were normalized across all samples and  
709 then used for differential expression analysis using DESeq (79) and edgeR (80)  
710 separately. Genes related to the immune system and with p-values of <0.05 from the  
711 edgeR pipeline were identified and categorized by major cell type, which were then  
712 plotted on individual heatmaps. Heatmaps were constructed using log<sub>2</sub> fold change data  
713 and using the 'pheatmap' package in R (81).

714

715 *Gene Set Enrichment Analysis:* GSEA was performed with the R package  
716 'ClusterProfiler' at default parameters. Enrichment scores were calculated against the  
717 following 4 pathway databases containing a priori-defined gene sets: Gene Ontology  
718 (GO) database, Hallmark (H) and Curated (C2) gene sets of the Molecular Signature  
719 database (MsigDB), and WikiPathways. Gene sets significantly enriched in the datasets  
720 ( $p < 0.05$ ) were subsequently curated for those relevant to NKT cell biological function.  
721 Enrichment plot was generated with the R software package 'ggplot2' and heatmaps  
722 with the 'pheatmap' package.

723

NKTT320 FINAL-JCI

724

725 **Data Analysis**

726 All flow cytometry data were analyzed using FlowJo version 9.9 (Ashland, Oregon).

727 Cytokine polyfunctionality analyses were done using simplified presentation of incredibly

728 complex evaluations (SPICE) (82). Graphs were generated, and t-tests were performed

729 using GraphPad/PRISM (LaJolla, CA). Statistical analyses were performed in

730 GraphPad/PRISM using the non-parametric Wilcoxon Signed Rank test or paired t-test.

NKTT320 FINAL-JCI

731 **Author Contributions:**

732 Designing research studies: AK, NB; conducting experiments: NB, SY, NR, DT, ES,  
733 TFS, LS; acquiring data NB, NR, DT, SY, ES, TFS, LS; analyzing data: NB, MF, JM,  
734 RS, AK; providing reagents: RS; and writing the manuscript: NB, AK.

735

736 **Acknowledgments:**

737 We would like to acknowledge TNPRC Veterinary Medicine Staff for caring for the  
738 animals, TNPRC Flow Cytometry Core for acquiring flow cytometry data, and the  
739 TNPRC Pathogen Detection and Quantification Core for reading and analyzing the  
740 Luminex plates. We thank Cathy Flemington and Alanna Wanek in the Tulane Center  
741 for Translational Research in Infection & Inflammation NextGen Sequencing Core for  
742 technical assistance for the RNA-Seq studies. We would like to acknowledge Dr. Mark  
743 Exley for thoughtful discussion. Study was funded by NIH/NIAID R01 AI102693 (AK),  
744 R21 AI145642 (AK) and P51 OD011104-55. The authors would like to thank the NIH  
745 Tetramer Core facility for provision of the CD1d<sup>TM</sup> conjugated to both APC and BV421.

746 **References:**

- 747 1. Berzins SP, Smyth MJ, and Baxter AG. Presumed guilty: natural killer T cell defects and  
748 human disease. *Nature reviews Immunology*. 2011;11(2):131-42.
- 749 2. Bendelac A, Savage PB, and Teyton L. The biology of NKT cells. *Annual review of*  
750 *immunology*. 2007;25:297-336.
- 751 3. Van Kaer L, Parekh VV, and Wu L. The Response of CD1d-Restricted Invariant NKT Cells  
752 to Microbial Pathogens and Their Products. *Frontiers in immunology*. 2015;6:226.
- 753 4. Watarai H, Nakagawa R, Omori-Miyake M, Dashtsoodol N, and Taniguchi M. Methods  
754 for detection, isolation and culture of mouse and human invariant NKT cells. *Nat Protoc*.  
755 2008;3(1):70-8.
- 756 5. Rout N, Else JG, Yue S, Connole M, Exley MA, and Kaur A. Paucity of CD4+ natural killer T  
757 (NKT) lymphocytes in sooty mangabeys is associated with lack of NKT cell depletion after  
758 SIV infection. *PLoS One*. 2010;5(3):e9787.
- 759 6. Brennan PJ, Brigl M, and Brenner MB. Invariant natural killer T cells: an innate activation  
760 scheme linked to diverse effector functions. *Nature reviews Immunology*.  
761 2013;13(2):101-17.
- 762 7. Fujii S, Liu K, Smith C, Bonito AJ, and Steinman RM. The linkage of innate to adaptive  
763 immunity via maturing dendritic cells in vivo requires CD40 ligation in addition to  
764 antigen presentation and CD80/86 costimulation. *The Journal of experimental medicine*.  
765 2004;199(12):1607-18.
- 766 8. Stober D, Jomantaite I, Schirmbeck R, and Reimann J. NKT cells provide help for  
767 dendritic cell-dependent priming of MHC class I-restricted CD8+ T cells in vivo. *J*  
768 *Immunol*. 2003;170(5):2540-8.
- 769 9. Carnaud C, Lee D, Donnars O, Park SH, Beavis A, Koezuka Y, et al. Cutting edge: Cross-  
770 talk between cells of the innate immune system: NKT cells rapidly activate NK cells. *J*  
771 *Immunol*. 1999;163(9):4647-50.
- 772 10. Chang PP, Barral P, Fitch J, Pratama A, Ma CS, Kallies A, et al. Identification of Bcl-6-  
773 dependent follicular helper NKT cells that provide cognate help for B cell responses.  
774 *Nature immunology*. 2011;13(1):35-43.
- 775 11. King IL, Fortier A, Tighe M, Dibble J, Watts GF, Veerapen N, et al. Invariant natural killer  
776 T cells direct B cell responses to cognate lipid antigen in an IL-21-dependent manner.  
777 *Nature immunology*. 2011;13(1):44-50.
- 778 12. Kopecky-Bromberg SA, Fraser KA, Pica N, Carnero E, Moran TM, Franck RW, et al. Alpha-  
779 C-galactosylceramide as an adjuvant for a live attenuated influenza virus vaccine.  
780 *Vaccine*. 2009;27(28):3766-74.
- 781 13. Gonzalez-Aseguinolaza G, Van Kaer L, Bergmann CC, Wilson JM, Schmieg J, Kronenberg  
782 M, et al. Natural killer T cell ligand alpha-galactosylceramide enhances protective  
783 immunity induced by malaria vaccines. *The Journal of experimental medicine*.  
784 2002;195(5):617-24.
- 785 14. Fujii S, Shimizu K, Smith C, Bonifaz L, and Steinman RM. Activation of natural killer T cells  
786 by alpha-galactosylceramide rapidly induces the full maturation of dendritic cells in vivo

NKTT320 FINAL-JCI

- 787 and thereby acts as an adjuvant for combined CD4 and CD8 T cell immunity to a  
788 coadministered protein. *The Journal of experimental medicine*. 2003;198(2):267-79.
- 789 15. Silk JD, Hermans IF, Gileadi U, Chong TW, Shepherd D, Salio M, et al. Utilizing the  
790 adjuvant properties of CD1d-dependent NK T cells in T cell-mediated immunotherapy.  
791 *The Journal of clinical investigation*. 2004;114(12):1800-11.
- 792 16. Venkataswamy MM, Baena A, Goldberg MF, Bricard G, Im JS, Chan J, et al. Incorporation  
793 of NKT cell-activating glycolipids enhances immunogenicity and vaccine efficacy of  
794 *Mycobacterium bovis* bacillus Calmette-Guerin. *J Immunol*. 2009;183(3):1644-56.
- 795 17. Fujii S, Shimizu K, Kronenberg M, and Steinman RM. Prolonged IFN-gamma-producing  
796 NKT response induced with alpha-galactosylceramide-loaded DCs. *Nature immunology*.  
797 2002;3(9):867-74.
- 798 18. Parekh VV, Wilson MT, Olivares-Villagómez D, Singh AK, Wu L, Wang CR, et al. Glycolipid  
799 antigen induces long-term natural killer T cell anergy in mice. *The Journal of clinical*  
800 *investigation*. 2005;115(9):2572-83.
- 801 19. Kunii N, Horiguchi S, Motohashi S, Yamamoto H, Ueno N, Yamamoto S, et al.  
802 Combination therapy of in vitro-expanded natural killer T cells and alpha-  
803 galactosylceramide-pulsed antigen-presenting cells in patients with recurrent head and  
804 neck carcinoma. *Cancer science*. 2009;100(6):1092-8.
- 805 20. Motohashi S, Okamoto Y, Yoshino I, and Nakayama T. Anti-tumor immune responses  
806 induced by iNKT cell-based immunotherapy for lung cancer and head and neck cancer.  
807 *Clinical immunology (Orlando, Fla)*. 2011;140(2):167-76.
- 808 21. Chang DH, Osman K, Connolly J, Kukreja A, Krasovsky J, Pack M, et al. Sustained  
809 expansion of NKT cells and antigen-specific T cells after injection of alpha-galactosyl-  
810 ceramide loaded mature dendritic cells in cancer patients. *The Journal of experimental*  
811 *medicine*. 2005;201(9):1503-17.
- 812 22. Scheuplein F, Thariath A, Macdonald S, Truneh A, Mashal R, and Schaub R. A humanized  
813 monoclonal antibody specific for invariant Natural Killer T (iNKT) cells for in vivo  
814 depletion. *PLoS One*. 2013;8(9):e76692.
- 815 23. Field JJ, Majerus E, Ataga KI, Vichinsky EP, Schaub R, Mashal R, et al. NNKTT120, an anti-  
816 iNKT cell monoclonal antibody, produces rapid and sustained iNKT cell depletion in  
817 adults with sickle cell disease. *PLoS One*. 2017;12(2):e0171067.
- 818 24. Reddy MP, Kinney CA, Chaikin MA, Payne A, Fishman-Lobell J, Tsui P, et al. Elimination of  
819 Fc receptor-dependent effector functions of a modified IgG4 monoclonal antibody to  
820 human CD4. *J Immunol*. 2000;164(4):1925-33.
- 821 25. Patel NP, Guan P, Bahal D, Hashem T, Scheuplein F, Schaub R, et al. Cancer  
822 Immunotherapeutic Potential of NKTT320, a Novel, Invariant, Natural Killer T Cell-  
823 Activating, Humanized Monoclonal Antibody. *Int J Mol Sci*. 2020;21(12).
- 824 26. Rout N, Greene J, Yue S, O'Connor D, Johnson RP, Else JG, et al. Loss of effector and anti-  
825 inflammatory natural killer T lymphocyte function in pathogenic simian  
826 immunodeficiency virus infection. *PLoS pathogens*. 2012;8(9):e1002928.
- 827 27. Newman R, Hariharan K, Reff M, Anderson DR, Braslawsky G, Santoro D, et al.  
828 Modification of the Fc region of a primatized IgG antibody to human CD4 retains its  
829 ability to modulate CD4 receptors but does not deplete CD4(+) T cells in chimpanzees.  
830 *Clinical immunology (Orlando, Fla)*. 2001;98(2):164-74.

NKTT320 FINAL-JCI

- 831 28. Bromley SK, Mempel TR, and Luster AD. Orchestrating the orchestrators: chemokines in  
832 control of T cell traffic. *Nature immunology*. 2008;9(9):970-80.
- 833 29. Deshmane SL, Kremlev S, Amini S, and Sawaya BE. Monocyte chemoattractant protein-1  
834 (MCP-1): an overview. *J Interferon Cytokine Res*. 2009;29(6):313-26.
- 835 30. Moestrup SK, and Moller HJ. CD163: a regulated hemoglobin scavenger receptor with a  
836 role in the anti-inflammatory response. *Ann Med*. 2004;36(5):347-54.
- 837 31. Bates JM, Flanagan K, Mo L, Ota N, Ding J, Ho S, et al. Dendritic cell CD83 homotypic  
838 interactions regulate inflammation and promote mucosal homeostasis. *Mucosal*  
839 *Immunol*. 2015;8(2):414-28.
- 840 32. Das T, Chen Z, Hendriks RW, and Kool M. A20/Tumor Necrosis Factor alpha-Induced  
841 Protein 3 in Immune Cells Controls Development of Autoinflammation and  
842 Autoimmunity: Lessons from Mouse Models. *Frontiers in immunology*. 2018;9:104.
- 843 33. Nimmerjahn F, and Ravetch JV. Fcγ receptors as regulators of immune responses.  
844 *Nature reviews Immunology*. 2008;8(1):34-47.
- 845 34. Monteiro RC, and Van De Winkel JG. IgA Fc receptors. *Annual review of immunology*.  
846 2003;21:177-204.
- 847 35. Huysamen C, and Brown GD. The fungal pattern recognition receptor, Dectin-1, and the  
848 associated cluster of C-type lectin-like receptors. *FEMS Microbiol Lett*. 2009;290(2):121-  
849 8.
- 850 36. McCormick SM, and Heller NM. Commentary: IL-4 and IL-13 receptors and signaling.  
851 *Cytokine*. 2015;75(1):38-50.
- 852 37. Ward AC. The role of the granulocyte colony-stimulating factor receptor (G-CSF-R) in  
853 disease. *Front Biosci*. 2007;12:608-18.
- 854 38. Dahlgren C, Holdfeldt A, Lind S, Martensson J, Gabl M, Bjorkman L, et al. Neutrophil  
855 Signaling That Challenges Dogmata of G Protein-Coupled Receptor Regulated Functions.  
856 *ACS Pharmacol Transl Sci*. 2020;3(2):203-20.
- 857 39. Zhao Y, and Shao F. The NAIP-NLRC4 inflammasome in innate immune detection of  
858 bacterial flagellin and type III secretion apparatus. *Immunol Rev*. 2015;265(1):85-102.
- 859 40. Gout E, Garlatti V, Smith DF, Lacroix M, Dumestre-Perard C, Lunardi T, et al.  
860 Carbohydrate recognition properties of human ficolins: glycan array screening reveals  
861 the sialic acid binding specificity of M-ficolin. *J Biol Chem*. 2010;285(9):6612-22.
- 862 41. Furukawa A, Kamishikiryo J, Mori D, Toyonaga K, Okabe Y, Toji A, et al. Structural  
863 analysis for glycolipid recognition by the C-type lectins Mincle and MCL. *Proc Natl Acad*  
864 *Sci U S A*. 2013;110(43):17438-43.
- 865 42. Freeman GJ, Long AJ, Iwai Y, Bourque K, Chernova T, Nishimura H, et al. Engagement of  
866 the PD-1 immunoinhibitory receptor by a novel B7 family member leads to negative  
867 regulation of lymphocyte activation. *The Journal of experimental medicine*.  
868 2000;192(7):1027-34.
- 869 43. Asosingh K, Lauruschkat CD, Alemagno M, Frimel M, Wanner N, Weiss K, et al. Arginine  
870 metabolic control of airway inflammation. *JCI Insight*. 2020;5(2).
- 871 44. McGovern N, Shin A, Low G, Low D, Duan K, Yao LJ, et al. Human fetal dendritic cells  
872 promote prenatal T-cell immune suppression through arginase-2. *Nature*.  
873 2017;546(7660):662-6.

NKTT320 FINAL-JCI

- 874 45. Geiger R, Rieckmann JC, Wolf T, Basso C, Feng Y, Fuhrer T, et al. L-Arginine Modulates T  
875 Cell Metabolism and Enhances Survival and Anti-tumor Activity. *Cell*. 2016;167(3):829-  
876 42 e13.
- 877 46. Dowling JK, Afzal R, Gearing LJ, Cervantes-Silva MP, Annett S, Davis GM, et al.  
878 Mitochondrial arginase-2 is essential for IL-10 metabolic reprogramming of  
879 inflammatory macrophages. *Nat Commun*. 2021;12(1):1460.
- 880 47. Normand S, Waldschmitt N, Neerincx A, Martinez-Torres RJ, Chauvin C, Couturier-  
881 Maillard A, et al. Proteasomal degradation of NOD2 by NLRP12 in monocytes promotes  
882 bacterial tolerance and colonization by enteropathogens. *Nat Commun*. 2018;9(1):5338.
- 883 48. Ohira T, Arita M, Omori K, Recchiuti A, Van Dyke TE, and Serhan CN. Resolvin E1  
884 receptor activation signals phosphorylation and phagocytosis. *J Biol Chem*.  
885 2010;285(5):3451-61.
- 886 49. Heinrich PC, Behrmann I, Muller-Newen G, Schaper F, and Graeve L. Interleukin-6-type  
887 cytokine signalling through the gp130/Jak/STAT pathway. *Biochem J*. 1998;334 ( Pt  
888 2):297-314.
- 889 50. Bainbridge TW, DeAlmeida VI, Izrael-Tomasevic A, Chalouni C, Pan B, Goldsmith J, et al.  
890 Evolutionary divergence in the catalytic activity of the CAM-1, ROR1 and ROR2 kinase  
891 domains. *PLoS One*. 2014;9(7):e102695.
- 892 51. Eissmann P, Beauchamp L, Wooters J, Tilton JC, Long EO, and Watzl C. Molecular basis  
893 for positive and negative signaling by the natural killer cell receptor 2B4 (CD244). *Blood*.  
894 2005;105(12):4722-9.
- 895 52. Caminschi I, Proietto AI, Ahmet F, Kitsoulis S, Shin Teh J, Lo JC, et al. The dendritic cell  
896 subtype-restricted C-type lectin Clec9A is a target for vaccine enhancement. *Blood*.  
897 2008;112(8):3264-73.
- 898 53. Cueto FJ, Del Fresno C, and Sancho D. DNGR-1, a Dendritic Cell-Specific Sensor of Tissue  
899 Damage That Dually Modulates Immunity and Inflammation. *Frontiers in immunology*.  
900 2019;10:3146.
- 901 54. Hwangbo C, Tae N, Lee S, Kim O, Park OK, Kim J, et al. Syntenin regulates TGF-beta1-  
902 induced Smad activation and the epithelial-to-mesenchymal transition by inhibiting  
903 caveolin-mediated TGF-beta type I receptor internalization. *Oncogene*. 2016;35(3):389-  
904 401.
- 905 55. Jura J, Skalniak L, and Koj A. Monocyte chemotactic protein-1-induced protein-1  
906 (MCP1) is a novel multifunctional modulator of inflammatory reactions. *Biochim  
907 Biophys Acta*. 2012;1823(10):1905-13.
- 908 56. Adada MM, Orr-Gandy KA, Snider AJ, Canals D, Hannun YA, Obeid LM, et al. Sphingosine  
909 kinase 1 regulates tumor necrosis factor-mediated RANTES induction through p38  
910 mitogen-activated protein kinase but independently of nuclear factor kappaB activation.  
911 *J Biol Chem*. 2013;288(38):27667-79.
- 912 57. Sugimoto T, Morioka N, Zhang FF, Sato K, Abe H, Hisaoka-Nakashima K, et al. Clock gene  
913 Per1 regulates the production of CCL2 and interleukin-6 through p38, JNK1 and NF-  
914 kappaB activation in spinal astrocytes. *Mol Cell Neurosci*. 2014;59:37-46.
- 915 58. Finlay D, and Cantrell D. The coordination of T-cell function by serine/threonine kinases.  
916 *Cold Spring Harb Perspect Biol*. 2011;3(1):a002261.
- 917 59. Lynch L. Adipose invariant natural killer T cells. *Immunology*. 2014;142(3):337-46.



NKTT320 FINAL-JCI

- 918 60. Gaya M, Barral P, Burbage M, Aggarwal S, Montaner B, Warren Navia A, et al. Initiation  
919 of Antiviral B Cell Immunity Relies on Innate Signals from Spatially Positioned NKT Cells.  
920 *Cell*. 2018;172(3):517-33 e20.
- 921 61. Lee YJ, Wang H, Starrett GJ, Phuong V, Jameson SC, and Hogquist KA. Tissue-Specific  
922 Distribution of iNKT Cells Impacts Their Cytokine Response. *Immunity*. 2015;43(3):566-  
923 78.
- 924 62. Fernandez CS, Jegaskanda S, Godfrey DI, and Kent SJ. In-vivo stimulation of macaque  
925 natural killer T cells with alpha-galactosylceramide. *Clinical and experimental*  
926 *immunology*. 2013;173(3):480-92.
- 927 63. Bricard G, Venkataswamy MM, Yu KO, Im JS, Ndonge RM, Howell AR, et al. A-  
928 galactosylceramide analogs with weak agonist activity for human iNKT cells define new  
929 candidate anti-inflammatory agents. *PLoS One*. 2010;5(12):e14374.
- 930 64. Giaccone G, Punt CJ, Ando Y, Ruijter R, Nishi N, Peters M, et al. A phase I study of the  
931 natural killer T-cell ligand alpha-galactosylceramide (KRN7000) in patients with solid  
932 tumors. *Clinical cancer research : an official journal of the American Association for*  
933 *Cancer Research*. 2002;8(12):3702-9.
- 934 65. Woltman AM, Ter Borg MJ, Binda RS, Sprengers D, von Blomberg BM, Scheper RJ, et al.  
935 Alpha-galactosylceramide in chronic hepatitis B infection: results from a randomized  
936 placebo-controlled Phase I/II trial. *Antiviral therapy*. 2009;14(6):809-18.
- 937 66. Saltiel AR, and Olefsky JM. Inflammatory mechanisms linking obesity and metabolic  
938 disease. *The Journal of clinical investigation*. 2017;127(1):1-4.
- 939 67. Damouche A, Lazure T, Avettand-Fènoël V, Huot N, Dejucq-Rainsford N, Satie AP, et al.  
940 Adipose Tissue Is a Neglected Viral Reservoir and an Inflammatory Site during Chronic  
941 HIV and SIV Infection. *PLoS pathogens*. 2015;11(9):e1005153.
- 942 68. Liu Y, Beyer A, and Aebersold R. On the Dependency of Cellular Protein Levels on mRNA  
943 Abundance. *Cell*. 2016;165(3):535-50.
- 944 69. Kato Y, Zaid A, Davey GM, Mueller SN, Nutt SL, Zotos D, et al. Targeting Antigen to  
945 Clec9A Primes Follicular Th Cell Memory Responses Capable of Robust Recall. *J Immunol*.  
946 2015;195(3):1006-14.
- 947 70. Fullerton JN, and Gilroy DW. Resolution of inflammation: a new therapeutic frontier.  
948 *Nat Rev Drug Discov*. 2016;15(8):551-67.
- 949 71. Truneh AC, FJ; Jones, TJ; Gregson, JP. In: Office USP ed. USA: NKT Therapeutics; 2013.
- 950 72. Exley MA, Hou R, Shaulov A, Tonti E, Dellabona P, Casorati G, et al. Selective activation,  
951 expansion, and monitoring of human iNKT cells with a monoclonal antibody specific for  
952 the TCR alpha-chain CDR3 loop. *European journal of immunology*. 2008;38(6):1756-66.
- 953 73. . FastQC: A quality control tool for high throughput sequence data.  
954 <http://www.bioinformatics.babraham.ac.uk/projects/fastqc/>. Accessed 10/09/2020,  
955 2020.
- 956 74. Bolger AM, Lohse M, and Usadel B. Trimmomatic: a flexible trimmer for Illumina  
957 sequence data. *Bioinformatics*. 2014;30(15):2114-20.
- 958 75. Schmieder R, and Edwards R. Quality control and preprocessing of metagenomic  
959 datasets. *Bioinformatics*. 2011;27(6):863-4.

NKTT320 FINAL-JCI

- 960 76. Kim D, Pertea G, Trapnell C, Pimentel H, Kelley R, and Salzberg SL. TopHat2: accurate  
961 alignment of transcriptomes in the presence of insertions, deletions and gene fusions.  
962 *Genome Biol.* 2013;14(4):R36.
- 963 77. Dobin A, Davis CA, Schlesinger F, Drenkow J, Zaleski C, Jha S, et al. STAR: ultrafast  
964 universal RNA-seq aligner. *Bioinformatics.* 2013;29(1):15-21.
- 965 78. O'Leary NA, Wright MW, Brister JR, Ciufo S, Haddad D, McVeigh R, et al. Reference  
966 sequence (RefSeq) database at NCBI: current status, taxonomic expansion, and  
967 functional annotation. *Nucleic Acids Res.* 2016;44(D1):D733-45.
- 968 79. Anders S, and Huber W. Differential expression analysis for sequence count data.  
969 *Genome Biol.* 2010;11(10):R106.
- 970 80. Robinson MD, McCarthy DJ, and Smyth GK. edgeR: a Bioconductor package for  
971 differential expression analysis of digital gene expression data. *Bioinformatics.*  
972 2010;26(1):139-40.
- 973 81. Kolde R. pheatmap: Pretty Heatmaps. <https://CRAN.R-project.org/package=pheatmap>.
- 974 82. Roederer M, Nozzi JL, and Nason MC. SPICE: exploration and analysis of post-cytometric  
975 complex multivariate datasets. *Cytometry A.* 2011;79(2):167-74.  
976
- 977

## NKTT320 FINAL-JCI

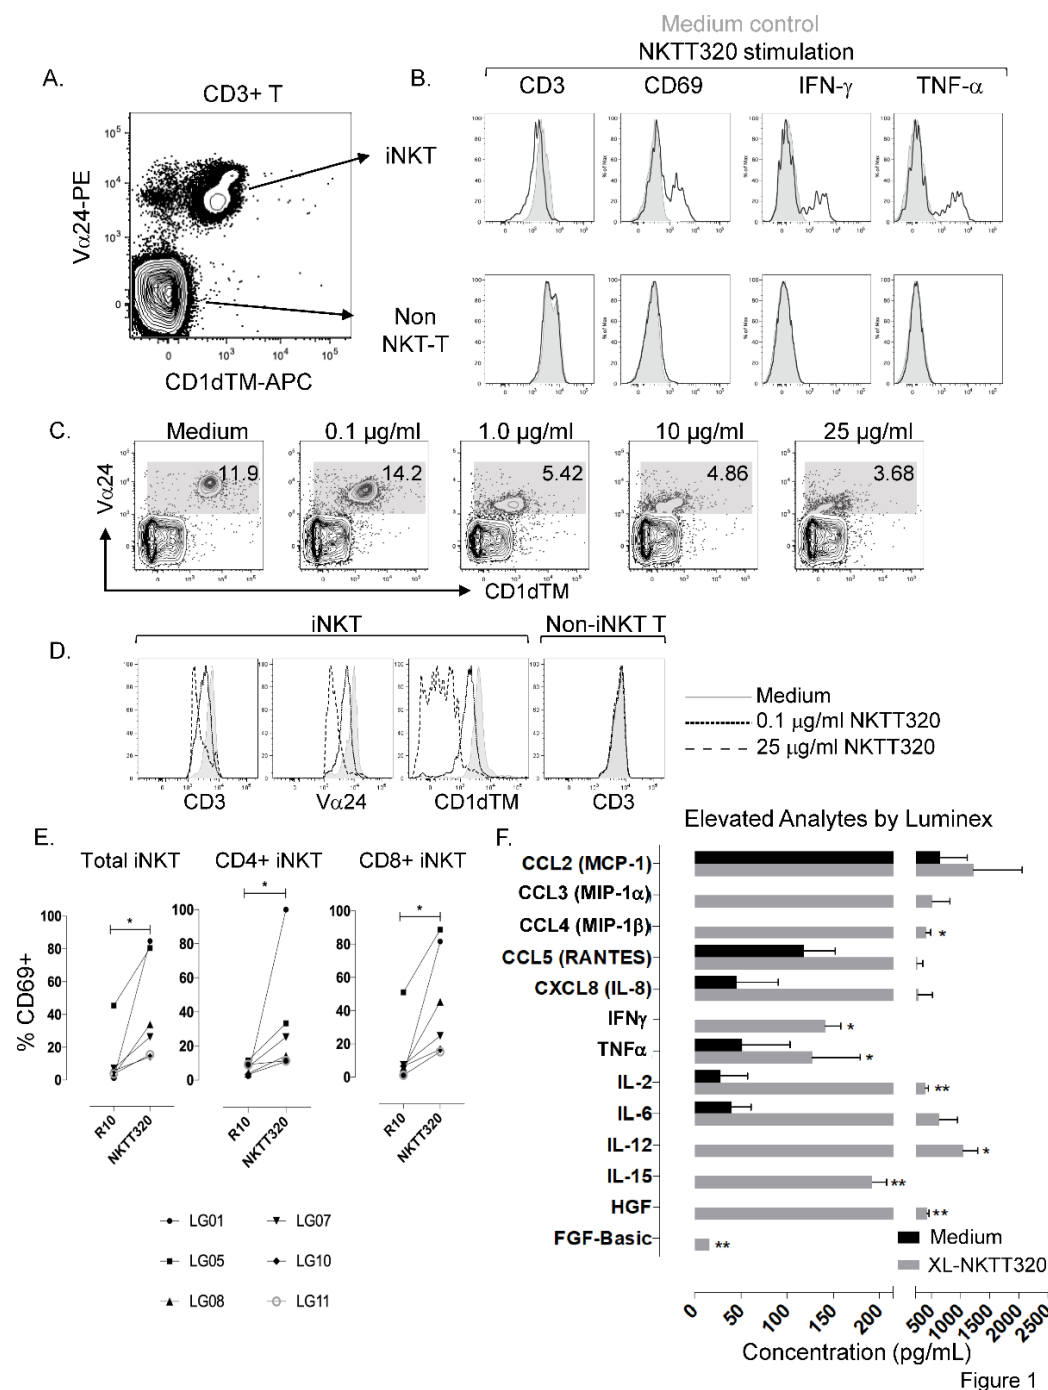

978  
979  
980  
981  
982  
983  
984  
985  
986  
987  
988

### Figure 1. iNKTs are specifically activated by NKTT320.

(A) Representative plot showing iNKT and non-NKT T-cell gating strategy gated on CD3+ T-cells. (B) Overlay histograms (unstimulated=shaded, NKTT320=open histogram) comparing CD3, CD69 and cytokine expression on R10 and NKTT320 (200ng/mL) treated PBMCs stimulated for 4hrs *in vitro*, iNKTs (top) and non-NKT T-cells (bottom). (C-D) *In vitro* data showing iNKT frequency and TCR downregulation after overnight incubation with escalating concentrations of NKTT320. TCR downregulation is measured by Vα24, CD1d and CD3. (E) CD4+ and CD8+ iNKT activation *in vitro* measured by CD69 in 6 animals stimulated with 200ng/mL NKTT320 for 4 hours. (F) Luminex data showing analytes which were elevated in cells stimulated with 200ng/mL NKTT320 compared to medium. Supernatants were collected after 48 hours. Statistics were done by non-parametric Wilcoxon signed-rank test (n=3). \*<0.05, \*\*<0.01.

## NKTT320 FINAL-JCI

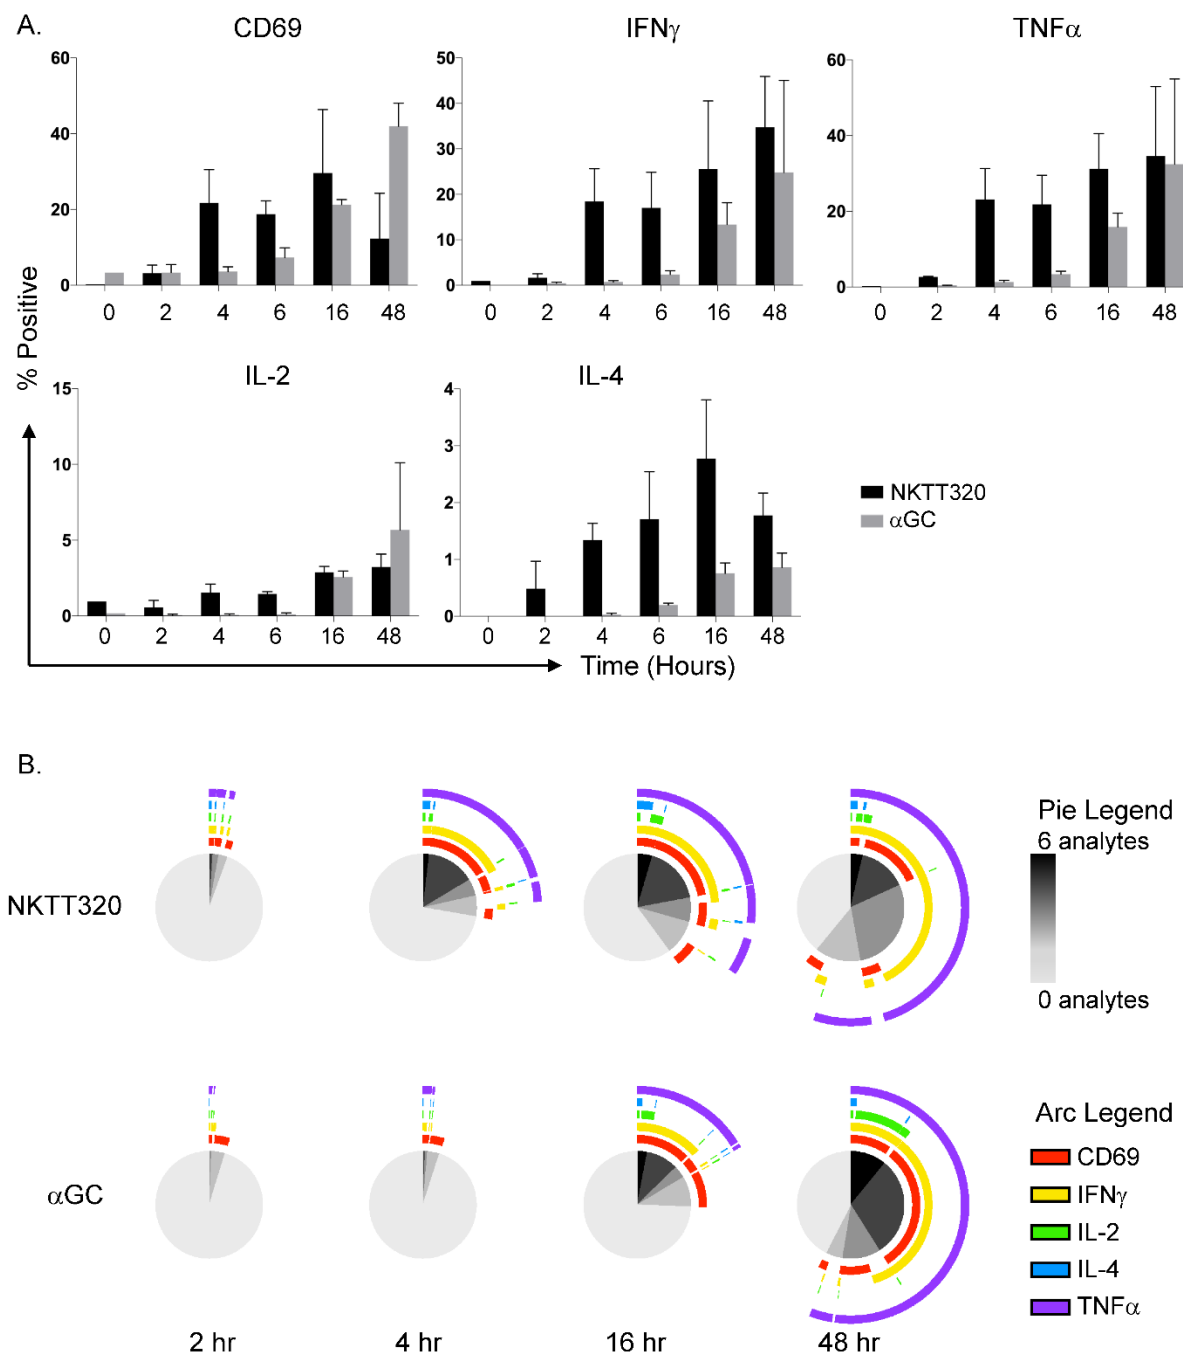

989  
990  
991  
992  
993  
994  
995  
996

### Figure 2. Differential kinetics of NKTT320 and αGC activation *in vitro*.

(A) Intracellular cytokine staining of PBMCs stimulated with goat-anti-mouse-IgG cross-linked NKTT320 or αGC loaded on C1Rd cells, harvested and stained at 0, 2, 4, 6, 16, and 48 hours. Data on cytokine secretion gated on iNKT cells. Mean and SEM shown (n=2). (B) SPICE analysis of experiment described in (A) showing kinetic differences in speed, magnitude and co-expression of cytokines in NKTT320 and αGC stimulated iNKT cells (n=2).

## NKTT320 FINAL-JCI

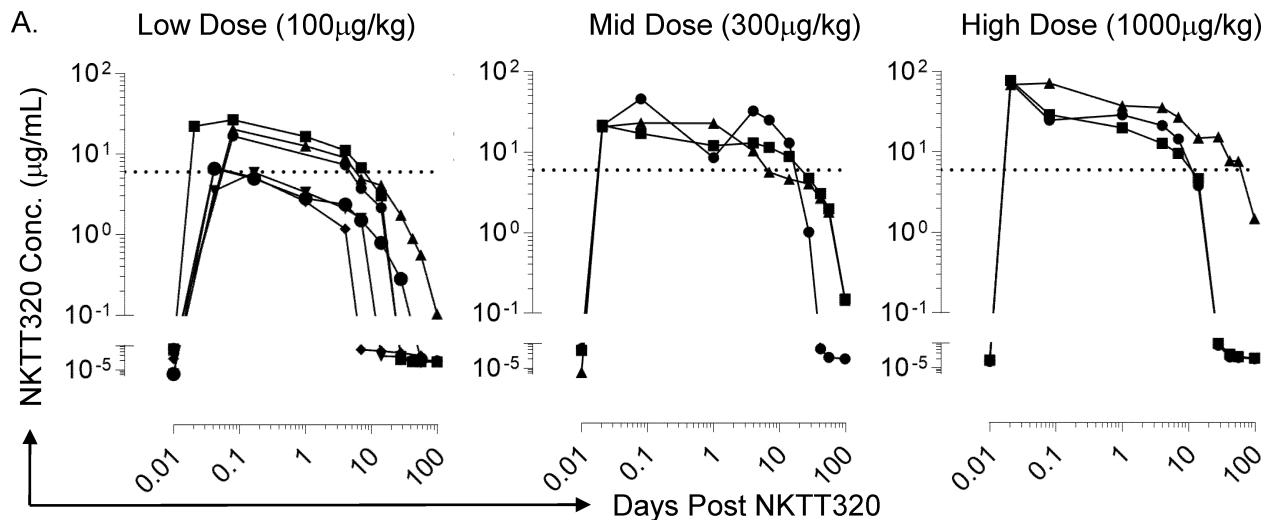

## B. NKTT320 Pharmacokinetics

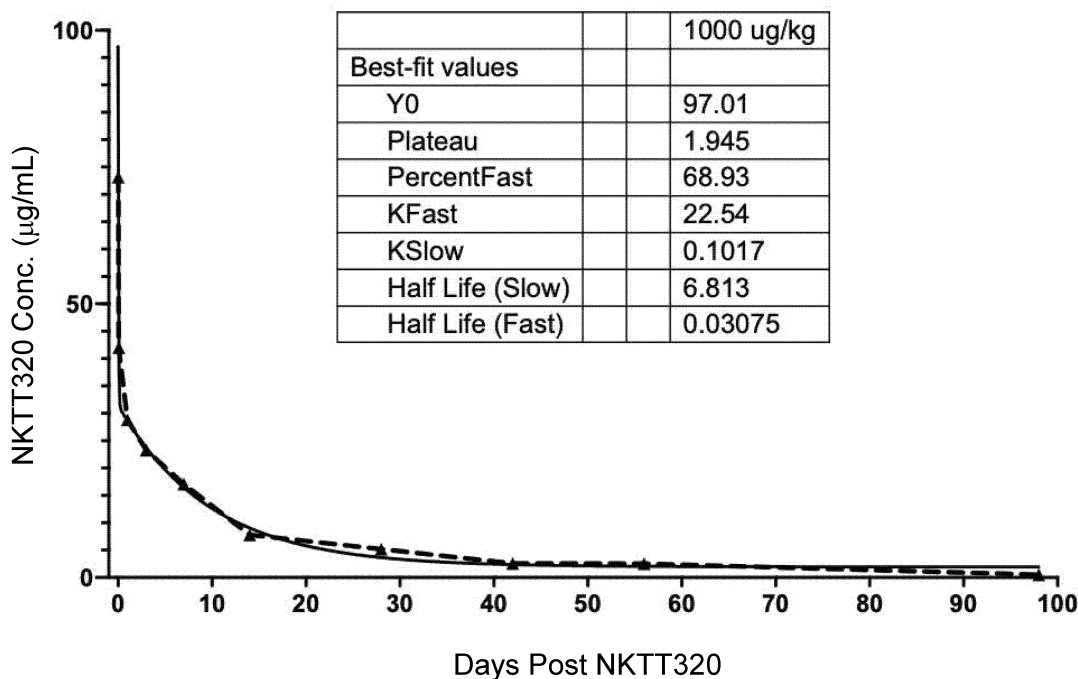

997  
998  
999  
1000  
1001  
1002  
1003  
1004  
1005  
1006

### Figure 3. *In vivo* pharmacokinetics of NKTT320.

(A) plasma NKTT320 concentration measured by ELISA in animals that received Low (100 $\mu$ g/kg, n=5), Mid (300 $\mu$ g/kg, n=3) and High (1000 $\mu$ g/kg, n=3) doses of NKTT320 IV. Horizontal dotted line shows NKT TCR saturation level (6 $\mu$ g/mL). Samples were taken at day 0 and 30 minutes, 2 hours, day 1, 4, 7, 14, 28, 42, 56, and 98 post-NKTT320 treatment. (B) NKTT320 pharmacokinetic data determined by a single dose of 1000 $\mu$ g/kg. Half-life shown in days.

## NKTT320 FINAL-JCI

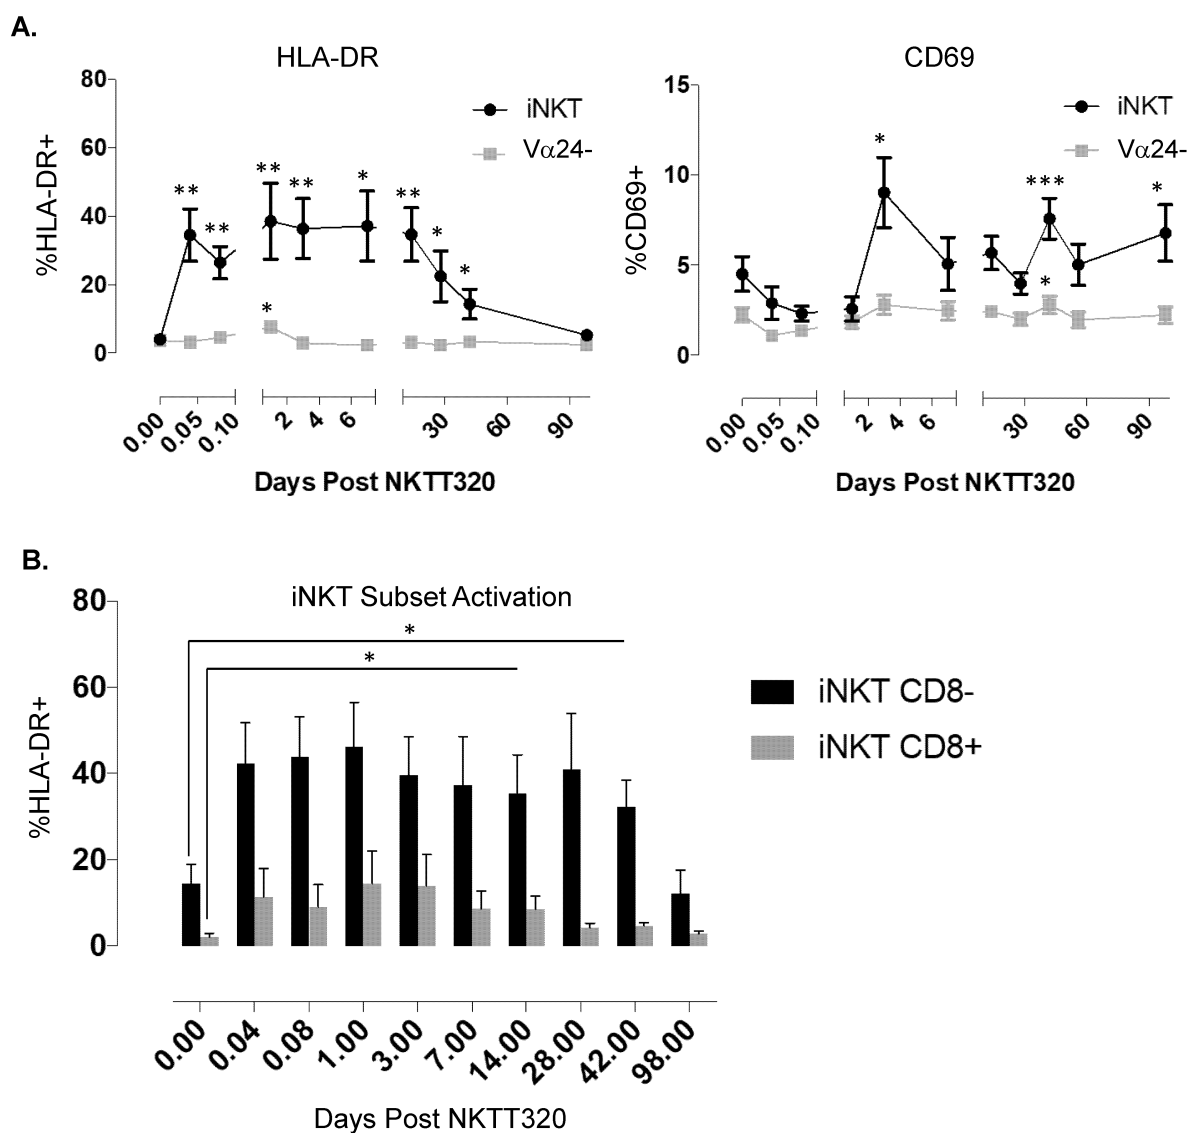

1007  
 1008  
 1009  
 1010  
 1011  
 1012  
 1013  
 1014  
 1015

## NKTT320 FINAL-JCI

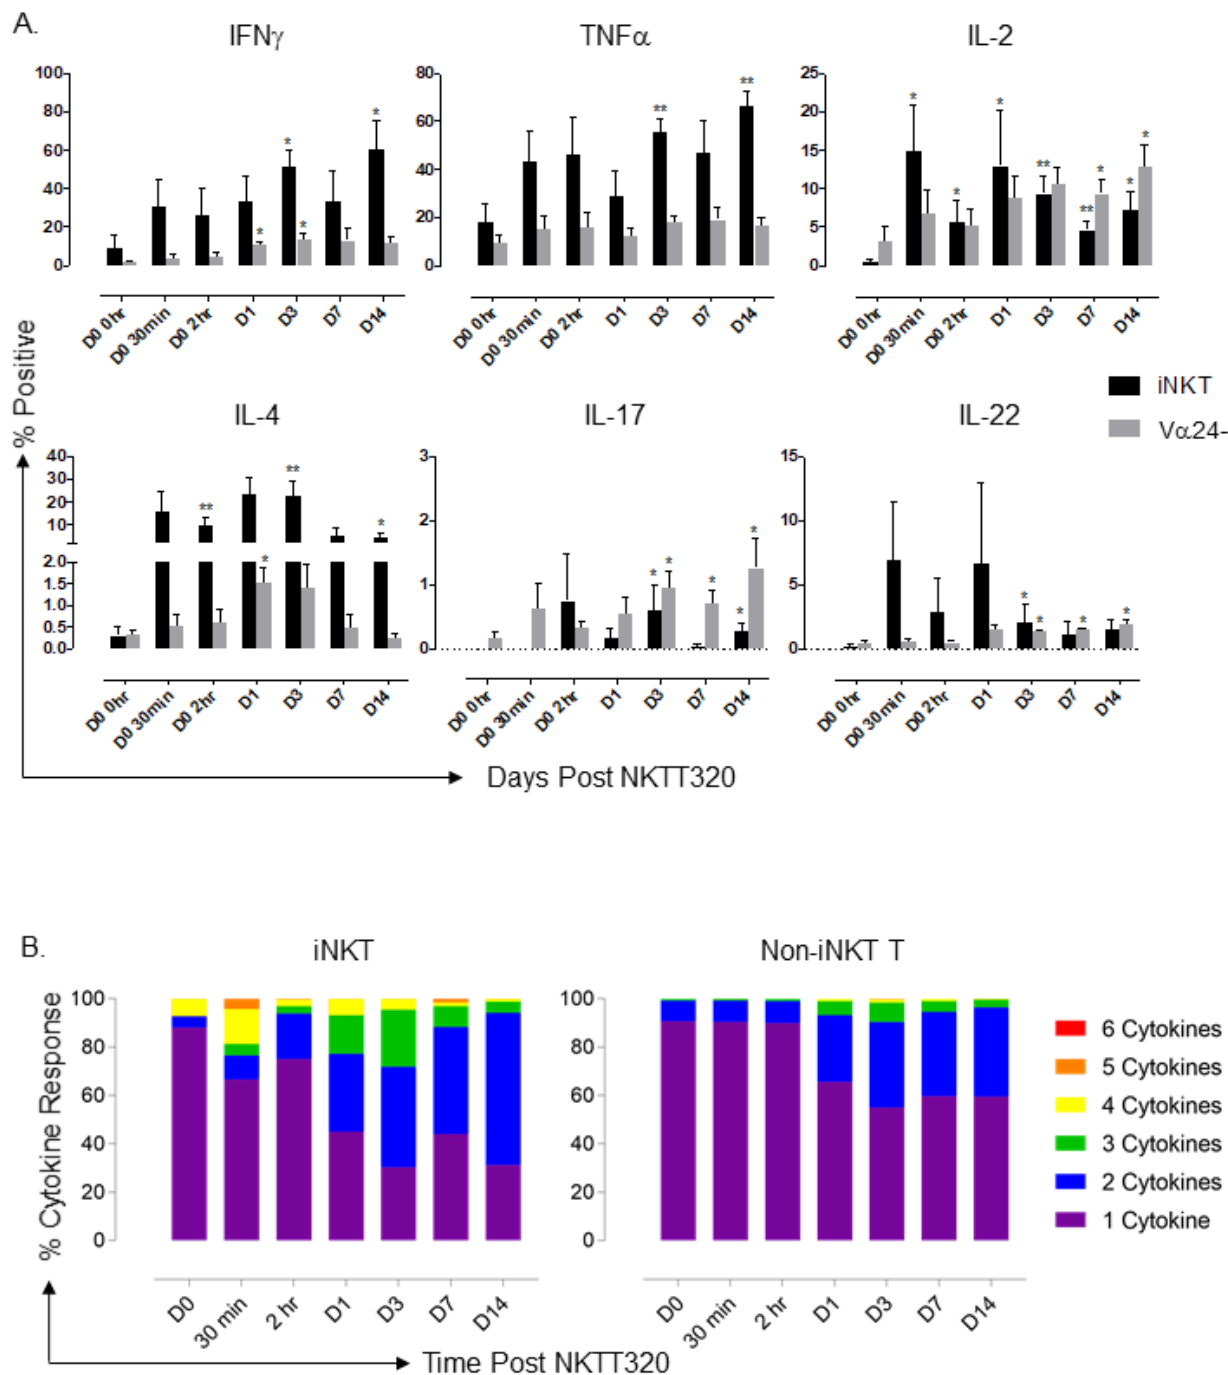

**Fig. 5. NKTT320 rapidly induces functional changes in T-cell subsets.**

(A) Mean cytokine expression in iNKTs and Non-iNKT Ts measured by intracellular cytokine staining following overnight PMA/ionomycin stimulation. Samples were taken at day 0 and 30 minutes, 2 hours, day 1, 4, 7, 14. Data in n=7 MCM. Significance compared to baseline is indicated by an asterisk and was determined by paired parametric t-test. \* $<0.05$ , \*\* $<0.01$ . (B) Proportion of iNKT vs Non-iNKT T-cells responding with one or more cytokines after stimulation with PMA/ionomycin (n=7).

1016  
1017  
1018  
1019  
1020  
1021  
1022  
1023  
1024  
1025

## NKTT320 FINAL-JCI

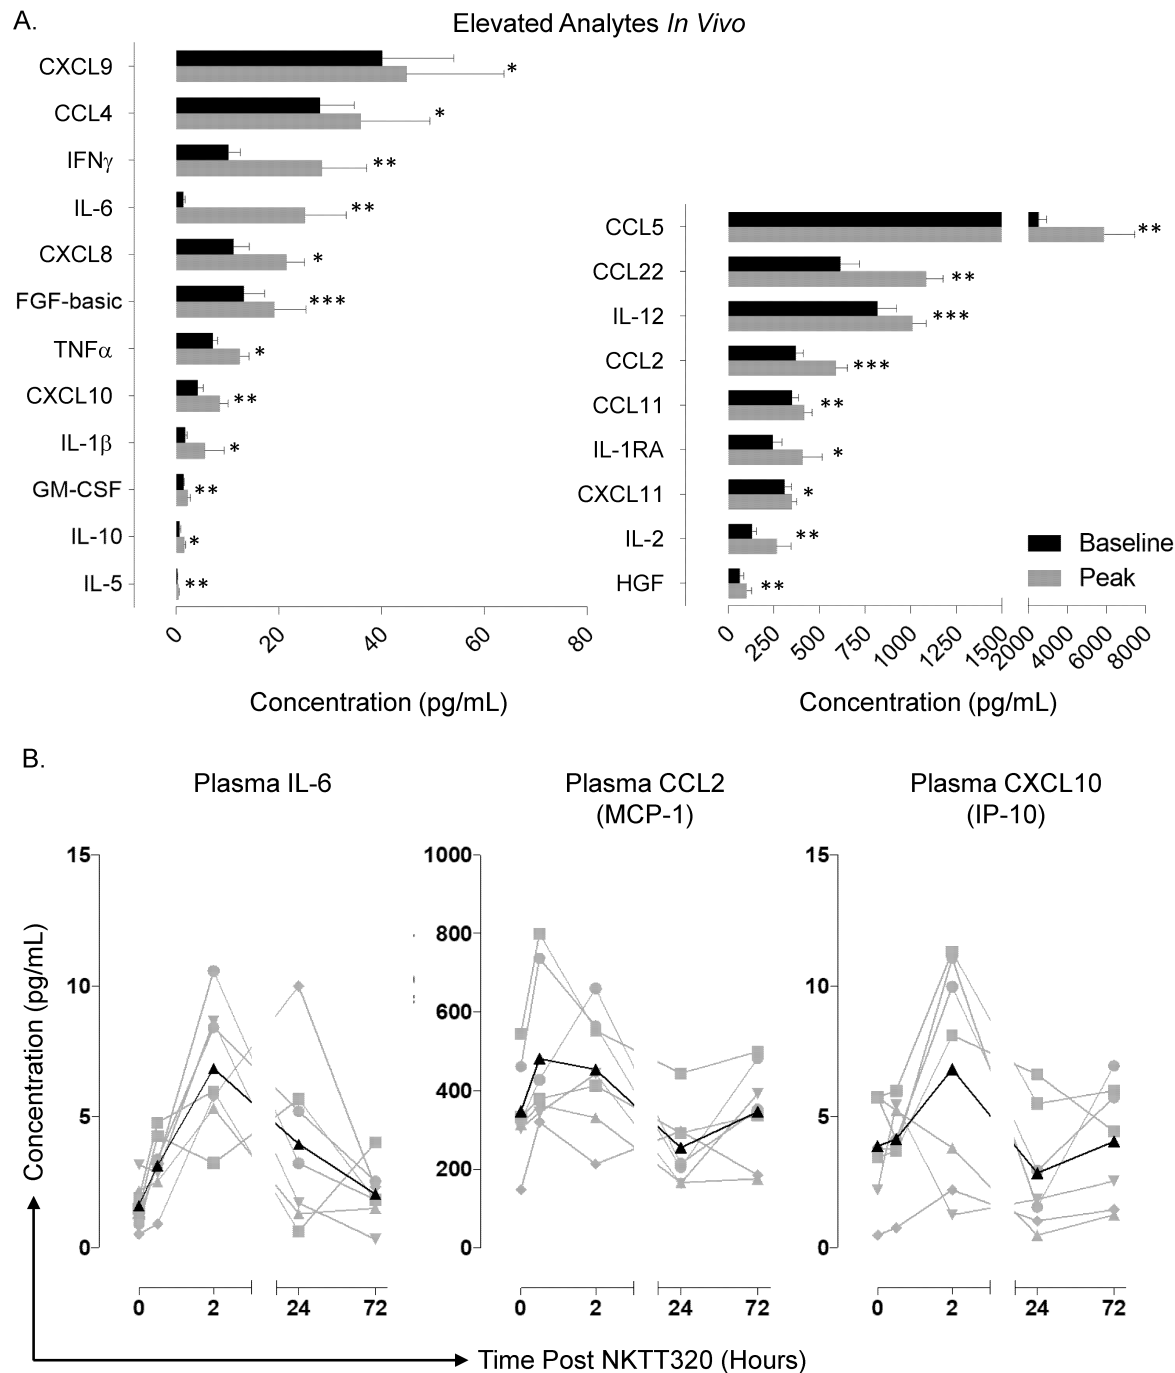

1026  
1027  
1028  
1029  
1030  
1031  
1032  
1033

**Fig. 6. NKTT320 rapidly induces functional changes *in vivo*.**

(A) Analytes significantly upregulated after NKTT320 treatment *in vivo* measured by plasma Luminex at baseline and peak (n=12). \* $<0.05$ , \*\* $<0.01$ , \*\*\* $<0.001$ . (B) *Ex vivo* plasma Luminex kinetics post NKTT320 for IL-6, CCL2, and CXCL10 in 7 animals from a single Luminex run.



NKTT320 FINAL-JCI

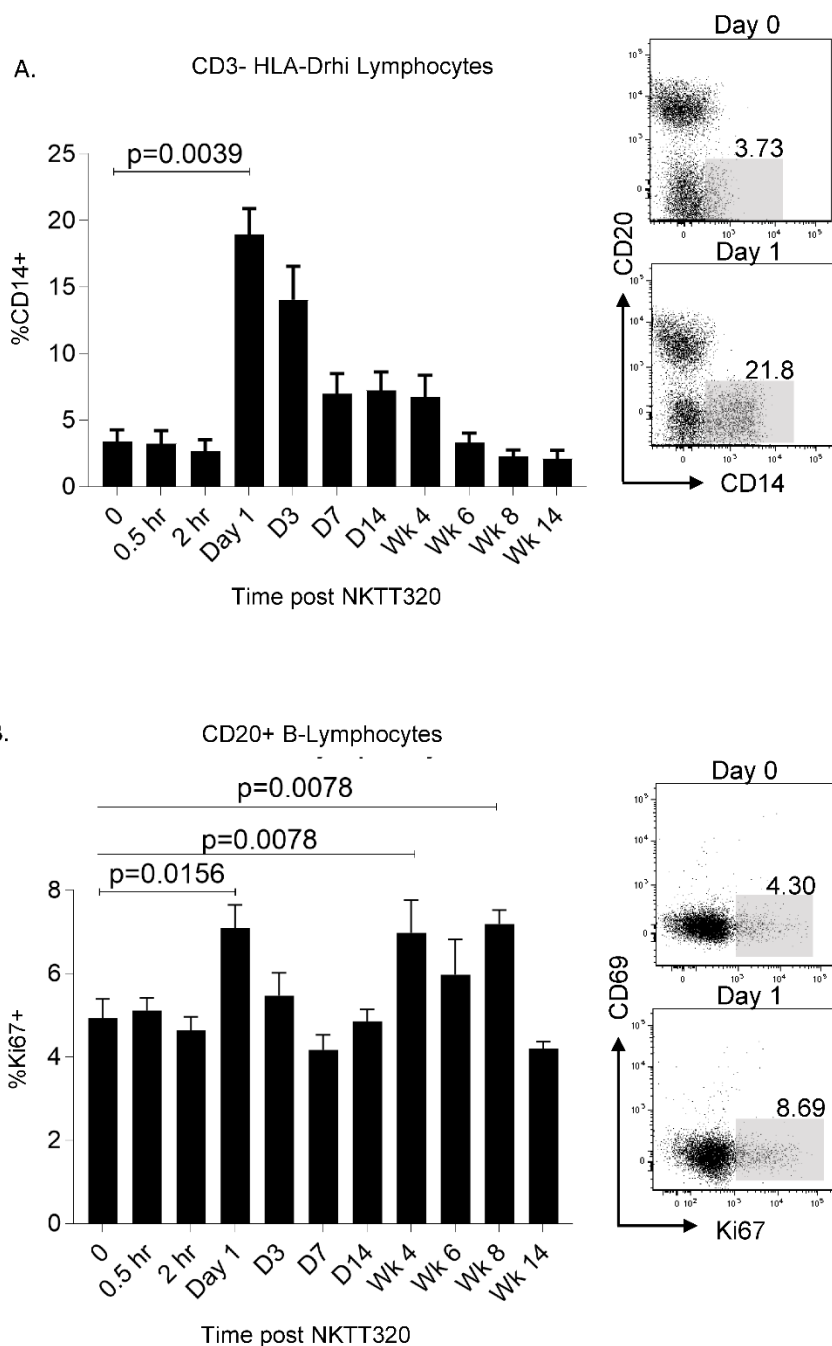

1034  
 1035 **Fig. 7. Increased frequency of circulating monocytes and increased proliferation of B-lymphocytes**  
 1036 **after NKTT320.**  
 1037 (A) Monocyte frequency shown as percentage of CD3- HLA-DRhi lymphocytes. Representative plots  
 1038 show an increase in circulating monocytes on day 1 compared to day 0. (B) B-cell proliferation measured  
 1039 by Ki67 expression on CD20+ B-cells. Representative plots show increases in B-cell Ki67 expression at  
 1040 day 1 post NKTT320 administration. Significant differences from baseline were determined through non-  
 1041 parametric Wilcoxon signed-rank test (n=9 MCM).  
 1042  
 1043

## NKTT320 FINAL-JCI

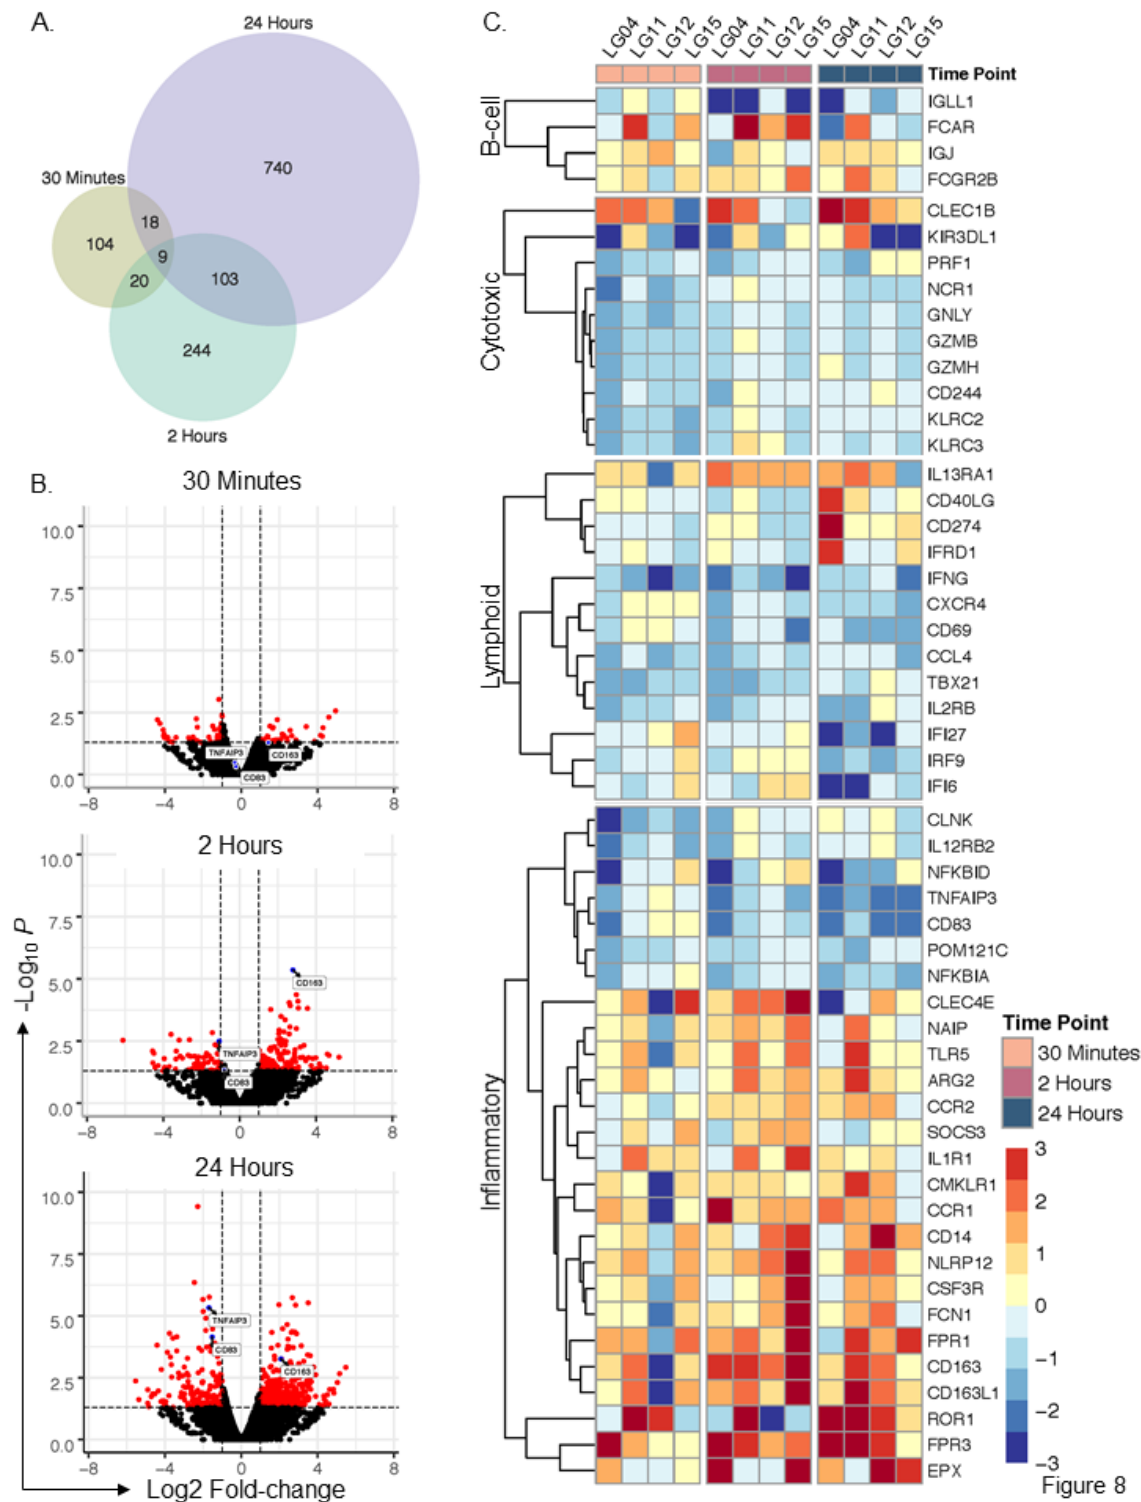

1044  
1045  
1046  
1047  
1048  
1049  
1050

### Fig. 8. RNA-seq analysis reveals rapid differential gene expression

A) Venn diagram showing differentially expressed genes where p-value <0.05 at 30 minutes, 2 hours and 24 hours. (B) Volcano plots of all genes showing kinetic increases in transcriptomic changes over time. (C) Heatmaps showing differential expression (log<sub>2</sub> fold change) for targeted genes where p-value <.05 related to B-cell, cytotoxic, lymphoid and inflammatory pathways.

## NKTT320 FINAL-JCI

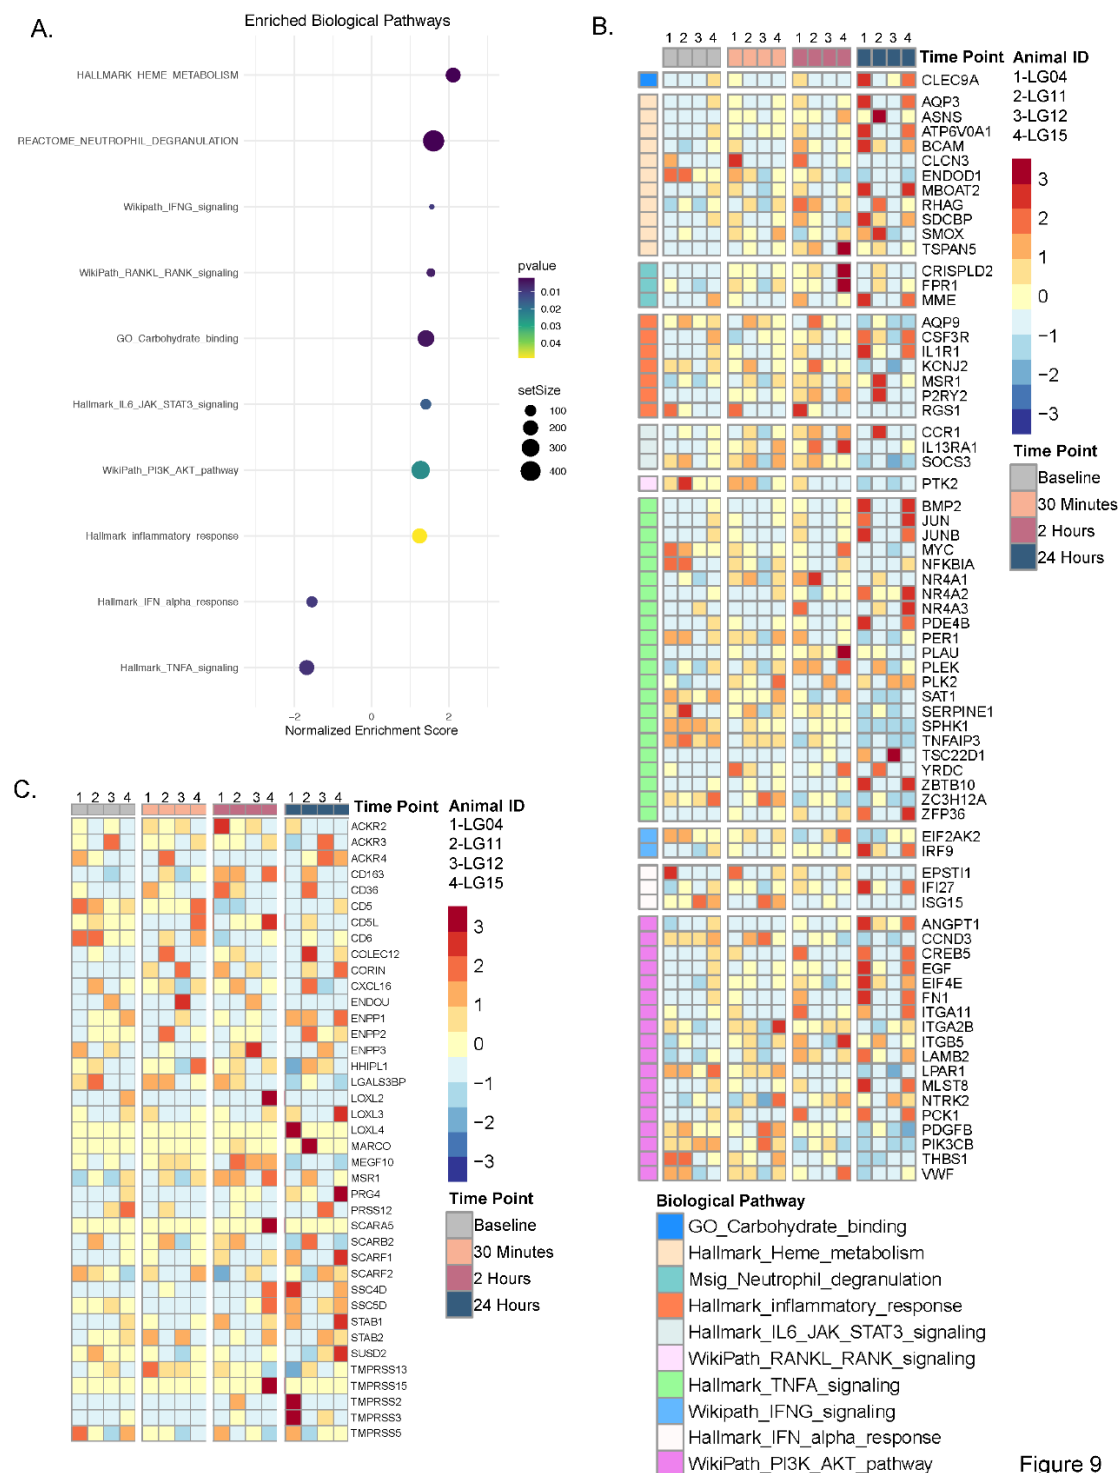

Figure 9

1051  
 1052 **Figure 9. Biological pathways related to NK T cells are enriched upon anti-NKT antibody**  
 1053 **administration.** (A). Normalized enrichment scores (NES) of relevant NKT-related pathways selected  
 1054 from an unbiased gene set enrichment analysis (GSEA). Color ramp represents NES significance  
 1055 defined by a Fisher's Exact test. Dot size represents 'setSize', or number of genes contained within an *a*  
 1056 *priori*-defined biological pathway. (B) Composite heatmap of genes meeting a significance threshold ( $p <$   
 1057  $0.05$ ) at 30 minute-, 2 hour-, and 1 day-post NKT-antibody administration that are contained within  
 1058 significantly enriched pathways depicted in (A). Rows are scaled by z-score-normalized expression. (C)  
 1059 Heatmap of genes within the GO pathway "scavenger receptor activity".

## NKTT320 FINAL-JCI

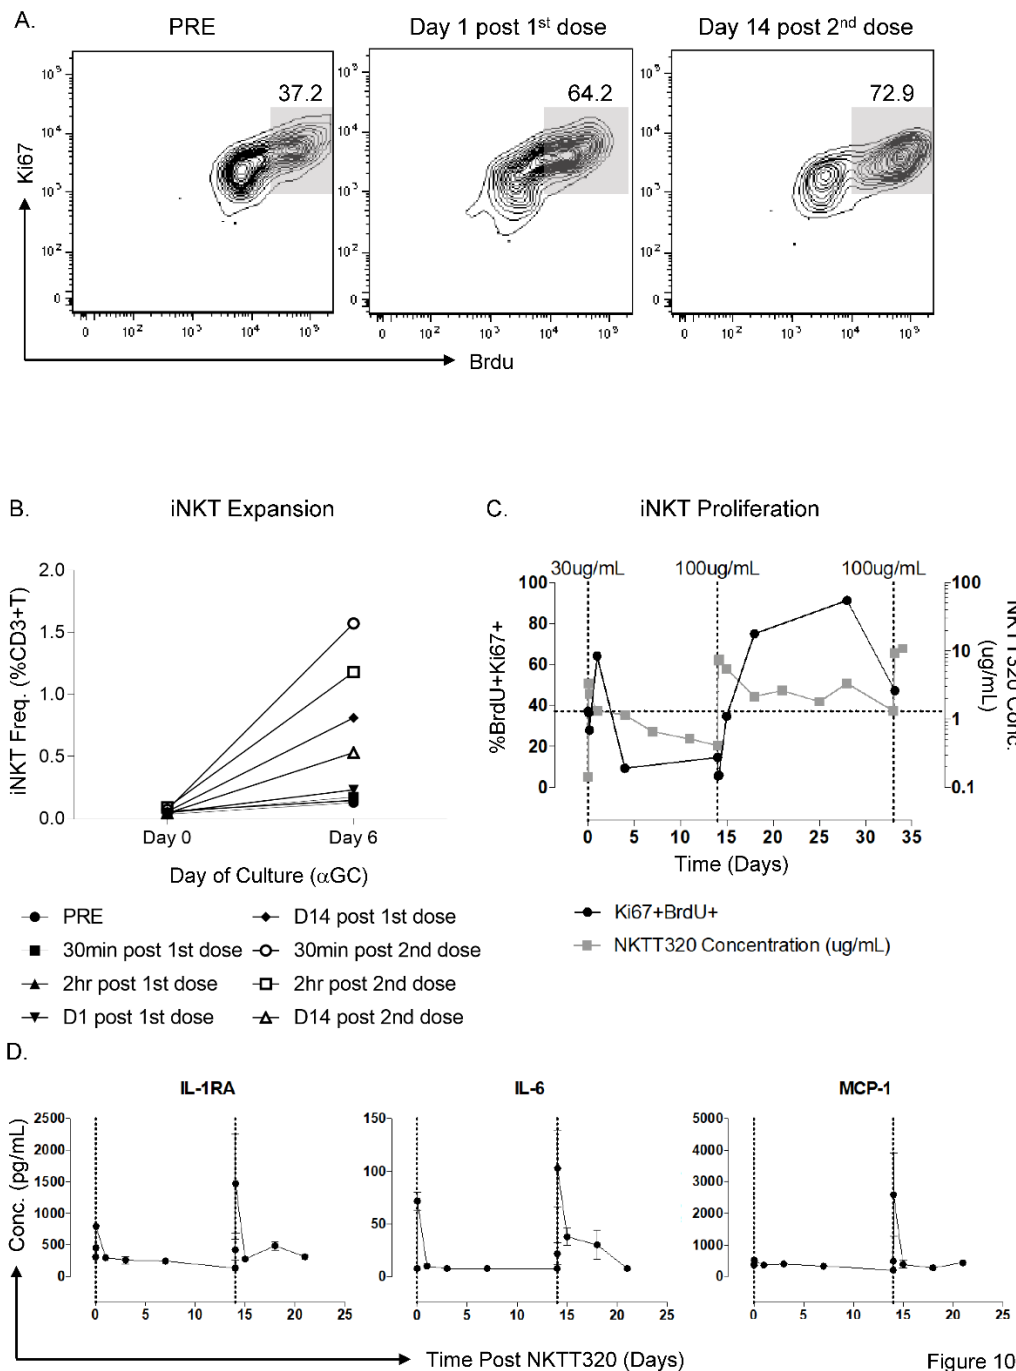

Figure 10

1060  
 1061 **Fig. 10. iNKTs retain proliferative capacity after NKTT320 indicating a lack of NKT energy.**  
 1062 (A) Representative plots of iNKT proliferative capacity after stimulation with aGC, pre-NKTT320, D1 post  
 1063 1<sup>st</sup> dose and D14 post 2<sup>nd</sup> dose. Data from *in vitro* proliferation assays performed in 1 multiply dosed  
 1064 MCM. (B) iNKT expansion after 6-day culture with aGC at the following time points: pre-NKTT320, 30min,  
 1065 2hr, D1 and D14 post 1<sup>st</sup> dose; and 30min, 2hr, and D14 post 2<sup>nd</sup> dose. Data from *in vitro* proliferation  
 1066 assays performed in 1 multiply dosed MCM. (C) iNKT proliferation measured as BrdU+ Ki67+ double  
 1067 positives by flow cytometry. Proliferation data is compared to plasma NKTT320 concentration measured  
 1068 by NKTT320 ELISA. Vertical lines indicate the time and concentration of each dose. Horizontal line  
 1069 indicates baseline iNKT proliferation. Vertical lines indicate timing of dosing. (D) *Ex vivo* plasma luminex  
 1070 data from animals that received 2 doses of NKTT320 (n=4).

NKTT320 FINAL-JCI

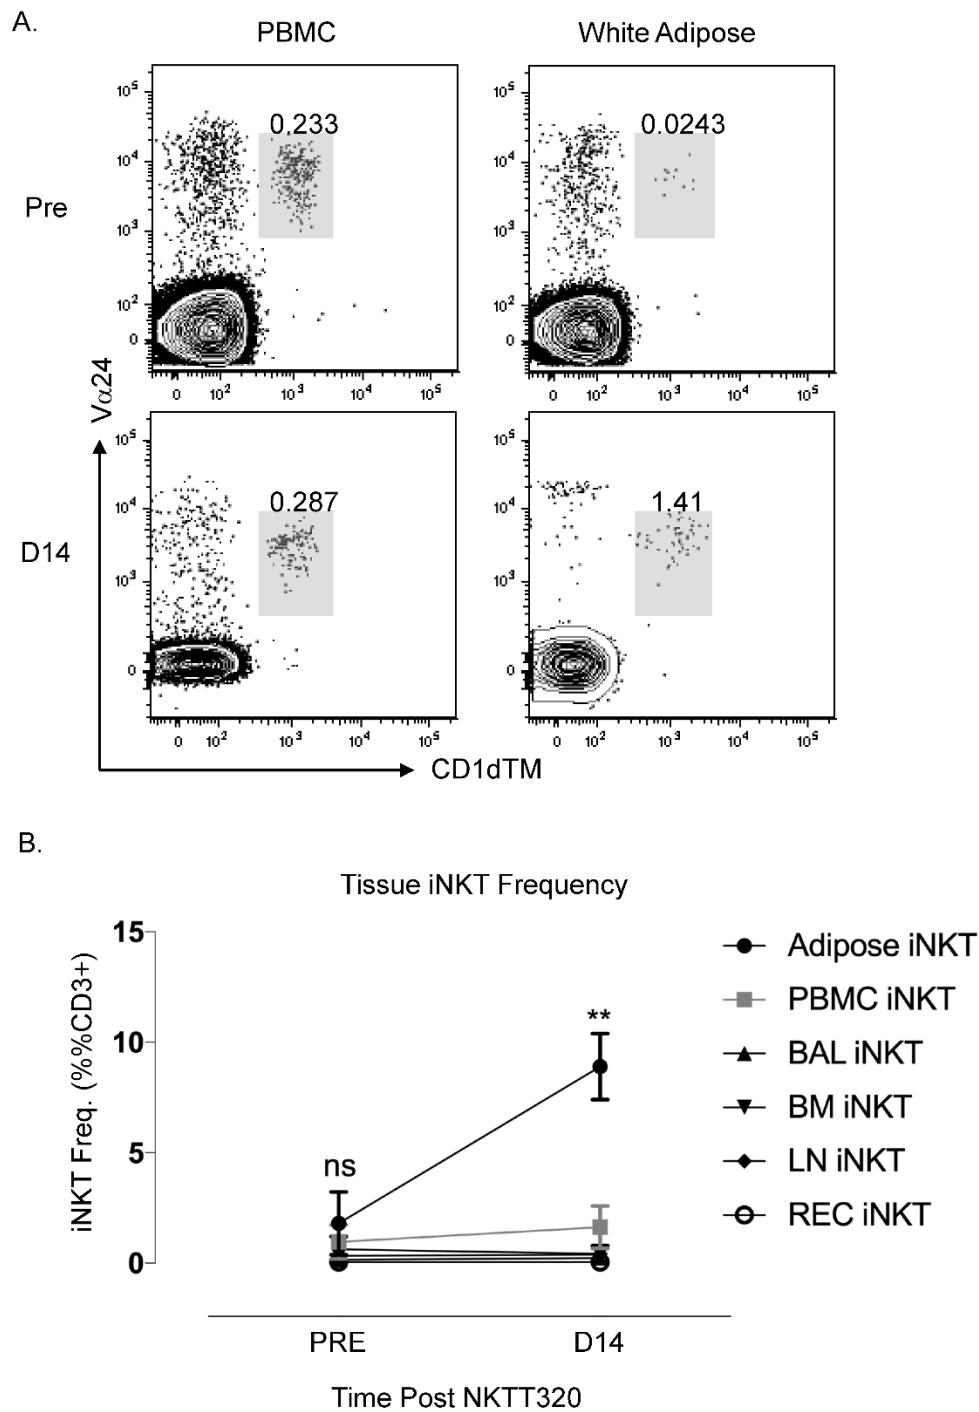

1071  
1072  
1073  
1074  
1075

**Fig. 11. NKTT320 treatment *in vivo* results in trafficking of iNKTs to adipose tissue sites.**  
(A) Representative plots of iNKT frequency pre and post NKTT320 treatment in white adipose and PBMC.  
(B) iNKT frequency in tissues and PBMC pre and 14 days post NKTT320 treatment (n=3). Paired t-test,  
\*\*<0.01. 'BAL'-bronchoalveolar lavage; 'BM'-bone marrow; 'LN'-lymph node; 'REC'-rectal mucosa.

NKTT320 FINAL-JCI

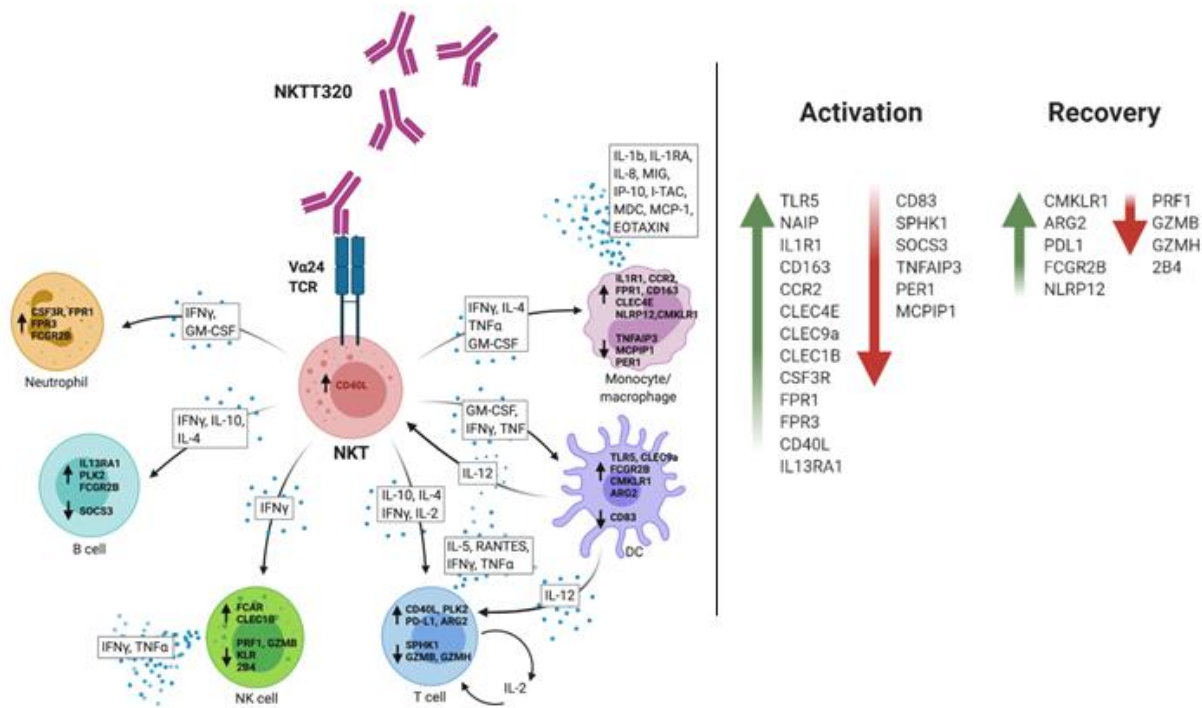

1076  
 1077 **Fig. 12. NKTT320 immune modulation.**  
 1078 Schematic effect of NKTT320 on iNKT and downstream immune cell subsets as measured by Luminex,  
 1079 ICS, and RNA-Seq. Genes and secreted molecules are placed according to potential cellular sources.  
 1080  
 1081
